# Supplementary material for: Valuing the impact of health and social care programs using social return on investment analysis: how have academics advanced the methodology? A systematic review
Source: PubMed Central journal article supplement — BMJ Open. 2019 Aug 24;9(8):e029789. doi: 10.1136/bmjopen-2019-029789 (PMC6720245; doi:10.1136/bmjopen-2019-029789), 2019-08-24
Supplement: bmjopen-2019-029789.draft_revisions.pdf [file bmjopen-2019-029789.draft_revisions.pdf]

# BMJ Open

BMJ Open is committed to open peer review. As part of this commitment we make the peer review history of every article we publish publicly available.

When an article is published we post the peer reviewers' comments and the authors' responses online. We also post the versions of the paper that were used during peer review. These are the versions that the peer review comments apply to.

The versions of the paper that follow are the versions that were submitted during the peer review process. They are not the versions of record or the final published versions. They should not be cited or distributed as the published version of this manuscript.

BMJ Open is an open access journal and the full, final, typeset and author-corrected version of record of the manuscript is available on our site with no access controls, subscription charges or pay-per-view fees (<http://bmjopen.bmj.com>).

If you have any questions on BMJ Open's open peer review process please email [info.bmjopen@bmj.com](mailto:info.bmjopen@bmj.com)

# BMJ Open

## Valuing the impact of health and social care programs using social return on investment analysis: how have academics advanced the methodology? A systematic review

|                               |                                                                                                                                                                                                                                                                                                                                                                                                                                                                                     |
|-------------------------------|-------------------------------------------------------------------------------------------------------------------------------------------------------------------------------------------------------------------------------------------------------------------------------------------------------------------------------------------------------------------------------------------------------------------------------------------------------------------------------------|
| Journal:                      | <i>BMJ Open</i>                                                                                                                                                                                                                                                                                                                                                                                                                                                                     |
| Manuscript ID                 | bmjopen-2019-029789                                                                                                                                                                                                                                                                                                                                                                                                                                                                 |
| Article Type:                 | Research                                                                                                                                                                                                                                                                                                                                                                                                                                                                            |
| Date Submitted by the Author: | 13-Feb-2019                                                                                                                                                                                                                                                                                                                                                                                                                                                                         |
| Complete List of Authors:     | Hutchinson, Claire; Flinders University, Nursing & Health Sciences<br>Berndt, Angela; University of South Australia Division of Health Sciences<br>Forsythe, Deborah; University of South Australia Division of Health Sciences<br>Gilbert-Hunt, Susan; University of South Australia Division of Health Sciences<br>George, Stacey; Flinders University Faculty of Medicine Nursing and Health Sciences<br>Ratcliffe, Julie; Flinders University, Flinders Clinical Effectiveness; |
| Keywords:                     | HEALTH ECONOMICS, Social care, social impact, social return on investment, SROI                                                                                                                                                                                                                                                                                                                                                                                                     |
|                               |                                                                                                                                                                                                                                                                                                                                                                                                                                                                                     |

SCHOLARONE™  
Manuscripts

1  
2  
3 **Valuing the impact of health and social care programs using social return on investment analysis:**  
4 **how have academics advanced the methodology? A systematic review**  
5  
6  
7

8 Claire Hutchinson\*

9 School of Health Sciences, University of South Australia, GPO Box 2471, Adelaide SA 5001, Australia

10 Health and Social Care Economics Group, College of Nursing and Health Sciences, Flinders University,  
11 GPO Box 2100, Adelaide, SA 5001, Australia, [claire.hutchinson@flinders.edu.au](mailto:claire.hutchinson@flinders.edu.au), Tel: +618 8201 3591

12  
13  
14  
15 Angela Berndt

16 School of Health Sciences, University of South Australia, GPO Box 2471, Adelaide SA 5001, Australia

17  
18  
19  
20  
21 Deborah Forsythe

22 School of Health Sciences, University of South Australia, GPO Box 2471, Adelaide SA 5001, Australia

23  
24  
25  
26 Susan Gilbert-Hunt

27 School of Health Sciences, University of South Australia, GPO Box 2471, Adelaide SA 5001, Australia

28  
29  
30  
31 Stacey George

32 College of Nursing and Health Sciences, Flinders University, GPO Box 2100, Adelaide SA 5001,  
33 Australia

34  
35  
36  
37  
38 Julie Ratcliffe

39 Institute for Choice, UniSA Business School, University of South Australia, GPO Box 2471, Adelaide SA  
40 5001, Australia

41 Health and Social Care Economics Group, College of Nursing and Health Sciences, Flinders University,  
42 GPO Box 2100, Adelaide, SA 5001, Australia

43  
44  
45  
46  
47  
48 \*corresponding author

49 **Word count:** 3419

50 **Abstract word count:** 282

51 **Number of references:** 31  
52  
53  
54  
55  
56  
57  
58  
59  
60

**ABSTRACT**

**Objectives:** To identify how social return on investment analysis – traditionally used by business consultants - has been interpreted, used and innovated by academics in one dominant social enterprise sector, that of health and social care. To assess the quality of social return on investment studies published under peer-review in health and social care.

**Design:** Systematic review

**Settings:** Community and residential settings.

**Participants:** A wide range of demographic groups and age groups.

**Results:** Limited uptake of social return on investment methodology by academics was found in the health and social care sector. From 868 papers screened, 8 studies met the criteria for inclusion in this systematic review. Study quality was found to be highly variable, ranging from 38%-90% based on scores from a purpose-designed quality assessment tool. In general, relatively high consistency and clarity was observed in the reporting of the research question, reasons for using this methodology and justifying the need for the study. However, weaknesses were observed in other areas including justifying stakeholders, reporting sample sizes, undertaking sensitivity analysis and reporting unexpected or negative outcomes. Most papers cited links to additional materials to aid in reporting. There was little evidence that academics had innovated or advanced the methodology beyond that outlined in a much-cited social return on investment guide.

**Conclusion:** Academics have thus far been slow to adopt social return on investment methodology in the evaluation of health and social care interventions, and there is little evidence of innovation and development of the methodology. The word count requirements of peer-reviewed journals may make it difficult for authors to be fully transparent about the details of their studies, potentially impacting the quality of reporting in those studies published in these journals.

1  
2  
3 **Keywords:** health economics, social care, social impact, social return on investment, SROI  
4  
5  
6  
7  
8  
9

10 **Strengths and limitations of this study**

- 11
- 12 • The first systematic review to examine the contribution of academics to social return on  
13 investment methodology in the context of the health and social care sector.  
14
  - 15 • The study reviewed the use of social return on investment methodology across a broad  
16 range of settings, interventions and participants in the health and social care sector.  
17
  - 18 • A useful quality assessment framework tool for comparing the quality of reporting SROI  
19 studies was developed, however refinement of the tool may be necessary to improve clarity.  
20
  - 21 • The review does not incorporate findings of studies published in the grey literature or non-  
22 peer reviewed journals, and hence cannot comment on the uptake of social return on  
23 investment methodology in health and social care studies more broadly.  
24  
25  
26  
27  
28  
29  
30  
31  
32  
33  
34  
35  
36  
37  
38  
39  
40  
41  
42  
43  
44  
45  
46  
47  
48  
49  
50  
51  
52  
53  
54  
55  
56  
57  
58  
59  
60

## BACKGROUND

Social enterprises offer an alternative model to non-profit organisations whereby market focuses are used to provide public or community benefit [1]. The number of social enterprise organisations operating in the health and social care sectors have seen a growth over the last decade [2-4]. This includes developed countries such as the UK and Australia [5-6], as well as developing nations such as Pakistan, Ghana and Vietnam [7-10]. The health and social care sector has been estimated to represent 20-30% of all social enterprise [7-10].

The measurement and valuation of outcomes can provide important information for social enterprises' stakeholders in assessing that funding is maximising social impact [11]. Social return on investment (SROI) methodology allows for values to be placed on personal, social and community outcomes which has not hitherto been possible with more established forms of economic evaluation [12,13].

With SROI methodology, social value is estimated by the allocation of financial proxy values to outcomes identified in an intervention's logic model (known as the theory of change). SROI is expressed as a ratio of the discounted value of benefits divided by total investment. Discounts to social value include estimations based on deadweight (what would have occurred anyway), displacement (what activities were displaced by the intervention), attribution (what other organisations contributed to the outcomes) and drop off (whether the outcomes experienced decline over time). Costs and benefits that occur at different time points are made comparable by adjusting for inflation in order to calculate net present value [13]. As an example, a SROI ratio of 4:1 illustrates that, following appropriate discounts, \$4 of social value was created for each dollar invested.

1  
2  
3 The methodology was initially developed in 2000, and the extant literature acknowledges strengths  
4 as well as challenges [4,11,14-18]. Strengths include: engagement with stakeholders, the identifying  
5 and valuing of outcomes which may be unique but considered valuable to beneficiaries, how the  
6 process reinforces mission and can lead to organisational learning, and the generation of a simple  
7 ratio which is easily comprehended [14,16,18]. Noted weaknesses include: the potential high cost of  
8 implementing SROI methodology, difficulties in valuing 'soft' outcomes as well as outcomes  
9 experienced at the societal level, and that ratios are highly context specific and cannot be compared  
10 [11,14,16].

11  
12 Since its development, SROI methodology has been most commonly implemented by consultants  
13 [11,12,17]. Consequently, SROI studies are more likely to be reported in the grey literature, if in the  
14 public domain at all. This potentially limits learning from previous studies as well as SROI  
15 methodological development [11,12,19]. There has been a call for academics to adopt the SROI  
16 approach and further develop the methodology [12,14,16,17], as well as a call for greater  
17 standardisation [12,14]. One associated effect of methodological engagement by academics would  
18 be an increase in SROI studies being the subject of peer-review. According to a 2015 systematic  
19 review of public health interventions evaluated using social return on investment methodology, only  
20 10% were published under peer review [16]. One common feature of SROI studies to date is that of  
21 'assurance'; that is, the process by which information reported is verified. This process is usually  
22 conducted by an SROI consultant external to the study [13,16]. With greater academic involvement  
23 in SROI, it would be expected that the peer-review process would replace assurance as being a more  
24 rigorous means of determining the appropriateness of the analysis and the assumptions on which it  
25 is based.

26  
27 However, some challenges to the adoption of SROI methodology by academics have been identified  
28 particularly at the theoretical level [12]. Arvidson et al. argues that the SROI approach, which

1  
2  
3 privileges the experiences and perspectives of stakeholders over other types of evidence, is  
4 essentially at odds with the positivist approach adopted by some academics engaged in evaluation  
5 studies [15]. Furthermore, Pathak and Dattani argue that the three functions of SROI (monitoring  
6 performance, attracting funding and reinforcing organisational mission) align with positivist, critical  
7 theory and interpretative approaches respectively which may present a barrier to the adoption of  
8 the methodology by academics [18]. This paper seeks to build on the work of the previous  
9 systematic review [16] to examine academic contributions to SROI methodology in one of the largest  
10 social enterprise sectors, that of health and social care.  
11  
12  
13  
14  
15  
16  
17  
18  
19  
20  
21  
22  
23  
24

### 25 **The current study**

26  
27 This systematic review identifies: (1) the extent to which academics have adopted SROI methodology  
28 in evaluating health and social care programs and interventions; (2) how academics have  
29 interpreted, used and developed SROI methodology; and (3) how academics have reported SROI  
30 studies using a quality review designed for the purpose [20].  
31  
32  
33  
34  
35  
36  
37  
38

### 39 **METHODS**

40  
41  
42 This review was conducted using the Preferred Reporting Items for Systematic Review and Meta-  
43 Analyses (PRSIMA) guidelines [21]. The protocol for this systematic review was registered with  
44 PROSPERO international prospective register of systematic reviews (number CRD42018080195) and  
45 published following peer-review [20].  
46  
47  
48  
49  
50  
51  
52  
53  
54

#### 55 *Inclusion and exclusion criteria*



1  
2  
3 This systematic review focused on SROI studies in health and social care settings; any age group or  
4 population and all empirical study types were therefore included if this criteria was met. Publications  
5 which were not peer-reviewed, conference abstracts, thesis, and papers not published in English  
6 were excluded.  
7  
8  
9  
10  
11  
12

### 13 14 *Search strategy*

15  
16 The key word search was limited to “social return on investment” and “SROI” to ensure that studies  
17 using SROI methodology were identified. Electronic searches were based on full text. Due to there  
18 being numerous keyword variations for health and social care, additional key words were not added  
19 but rather all items screened for relevancy.  
20  
21  
22

23  
24 Searches were limited to papers published after the year 2000 to October 1<sup>st</sup> 2018. The following  
25 multi-disciplinary databases were searched: Web of Science, Scopus, CINAHL, Econlit, Medline,  
26 PsychINFO, Embase, Emerald, Social Care Online, and the National Institute for Health and Care  
27 Excellence (Appendix I).  
28  
29  
30  
31  
32  
33

### 34 35 36 *Screening and data extraction*

37  
38 Search results were stored in Covidence systematic review software [22] and duplicate items  
39 removed. Two reviewers independently screened all titles and abstracts against the inclusion criteria  
40 to reduce the risk of bias. A third reviewer screened all titles and abstracts where there was  
41 disagreement between reviewers. Full text manuscripts were obtained for papers that met the  
42 inclusion criteria at initial screening and were again independently reviewed by two reviewers.  
43  
44 Following full text screening, the reference lists of studies shortlisted – plus the reference list of a  
45 previous systematic review [16] – were then hand searched for additional eligible articles and a  
46 citation search was performed on Scopus and Google Scholar.  
47  
48  
49  
50  
51  
52  
53  
54  
55  
56  
57  
58  
59  
60

1  
2  
3 Data on included studies was extracted on the following categories: author, date of publication,  
4 country, intervention, study design, article word count, and type of externally referenced results if  
5 applicable. To address the second and third aim of the review, innovations or adaptations to the  
6 methodology were also identified and quality assessment scores added (Appendix II).  
7  
8  
9  
10  
11  
12  
13  
14

### 15 *Quality assessment*

16  
17 A SROI-specific quality framework was developed for the purpose of this systematic review as it was  
18 identified that there was no relevant established peer reviewed quality framework. Further details  
19 of the quality framework and the processes associated with its development are presented in a  
20 separate paper [20].  
21  
22  
23  
24  
25

26 In brief, the quality framework consists of 21 questions in 6 areas: 1) research question, 2) reason for  
27 using SROI, 3) scope, 4) theory of change/impact map, 5) study design, and 6) analysis. Each item can  
28 be scored according to four categories: yes, no, not clear and not applicable. Data not reported was  
29 scored as a 'no', data inadequately reported was scored as 'not clear'. If an aspect of the quality  
30 framework was not relevant to a particular study, it was marked as 'not applicable'.  
31  
32  
33  
34  
35  
36  
37  
38  
39

### 40 *Data synthesis*

41  
42 Data was synthesised to address the three stated systematic review objectives. To address objective  
43 one, the number of included studies was compared to the findings of a previous systematic review  
44 that included peer-reviewed and grey literature in public health [16], to gain an indication of  
45 whether there has been an increase or decrease in SROI studies in recent years. Data to address  
46 objective two was determined by a review of the adopted methodology compared to that outlined  
47 in the SROI Network's Guide to Social Return on investment [13]. This guide has been established in  
48 previous reviews as the most extensively cited resource for the conducting of SROI studies [12, 16].  
49  
50  
51  
52  
53  
54  
55  
56  
57  
58  
59  
60

1  
2  
3 Finally, we report findings from our quality review in both table and narrative format, highlighting  
4 key strengths and weaknesses of the included studies. Only the main manuscript and permalink  
5 supplementary information was considered to be part of the peer-reviewed content. As expected,  
6 meta-analysis was not possible due to the heterogeneous nature of the results, however, we report  
7 on identified meta-biases.  
8  
9  
10  
11  
12  
13

## 17 **RESULTS**

### 19 *Search Results*

21 The initial searches returned 868 items, reduced to 595 items once duplicates were removed (Figure  
22 1). Following independent title and abstract screening by two reviewers, a third reviewer screened  
23 all titles and abstracts where there was disagreement between reviewers (n=63, 10.6%). Full text  
24 manuscripts were obtained for 41 studies that met the inclusion criteria. The full text of each study  
25 was then independently reviewed by two reviewers (CH, DF), resulting in six studies for inclusion.  
26 The searching of reference lists from the included studies and a previous systematic review [15], and  
27 an associated citation search performed on Scopus and Google Scholar, resulted in the identified of  
28 two further studies. The total number of studies included in this systematic review was eight.  
29  
30  
31  
32  
33  
34  
35  
36  
37  
38  
39  
40  
41

### 42 *Study Characteristics*

44 Of the eight SROI studies, the majority were undertaken in developed nations with half conducted in  
45 the UK, two in Canada and one each in the US and Kenya. One intervention was aimed at children  
46 [23], two at pregnant or post-partum women [24,25], two at adults overcoming addiction [26,27],  
47 one at adults and families transitioning from homelessness [28], and two at older people [29,30]. In  
48 conducting their analysis, all but one study [29] referred extensively to the Guide to social return on  
49 investment [13].  
50  
51  
52  
53  
54  
55  
56  
57  
58  
59  
60

1  
2  
3 Though it was expected that peer-reviewed publications would be authored by academics, one  
4 paper was written by a consultant and an organisational representative [26]. The remaining papers  
5 were published by affiliated academics, though some were published in partnership: academics and  
6 consultants [24], and academics and an organisational representative [28]. Two papers highlighted  
7 that their findings had also been assured by an SROI consultant [23, 30].  
8  
9

10  
11  
12 The eight SROI peer-reviewed studies were published relatively recently (between 2011 and 2018)  
13 with 3 of these published in 2015. Thereby indicating that academics have thus far been slow to  
14 adopt SROI methodology in the evaluation of health and social care interventions given that the  
15 methodology was initially developed in 2000 [3].  
16  
17

18  
19 Potentially due to the limitations imposed by resource constraints, it was observed that data was  
20 gathered from a limited number of stakeholder groups in many studies, most commonly  
21 intervention beneficiaries, though inclusion of some other groups was noted: families or carers  
22 [23,30], volunteers [23,24,30], and paid staff [23,28,29]. One exception was Goudet et al., whose  
23 study included a broad range of stakeholders and a large sample size (over 400) including  
24 beneficiaries, different types of family members, health care providers, and local businesses [25].  
25  
26

27  
28 For studies that included previous beneficiaries of an intervention [23-27, 29,30] there was the  
29 potential for positive sample bias, as those for whom the intervention was a success may be more  
30 willing to participate in an evaluation or may be more likely to be put forward for inclusion by the  
31 organisation offering the intervention. Most studies [23-26,28,30] collected data at only one time  
32 point (retrospectively) which limits our understanding of the impact of the intervention, as opposed  
33 to pre-post data collection for example, and also increases the likelihood of memory bias. There was  
34 also a potential positivity bias in the reporting of outcomes, as few studies reported negative  
35 outcomes [25,30].  
36  
37  
38  
39  
40  
41  
42  
43  
44  
45  
46  
47  
48  
49  
50  
51  
52  
53  
54  
55  
56  
57  
58  
59  
60

1  
2  
3 Other than focusing on a limited range of stakeholders, another way to reduce scope and therefore  
4 costs associated with conducting a SROI analysis is to focus on a limited range of outcomes, and to  
5 attribute values based on those identified in the existing literature. Goudet et al. was the only study  
6 that reported using values games with participants to develop bespoke values for outcomes. Value  
7 games are a revealed preference approach whereby participants rank an outcome without a market  
8 value with several items that can be purchased. In this way the value of the outcome can be  
9 estimated as somewhere between the value of the items either side of it in the ranking. Goudet et  
10 al. identified 34 outcomes, which may have impacted upon the final SROI ratios, as the authors  
11 reported a significantly higher SROI than all other papers (US\$71 social return for every US\$1  
12 invested) [25]. Other papers reported between two outcomes [28] and 10 outcomes [26] SROI ratios  
13 were between 1.17:1 [30] and 6.09:1 [26].

14  
15  
16 Although it was expected that the adoption of SROI methodology by academics may lead to  
17 innovation and development of the methodology [14, 16], there was little evidence of this. However,  
18 some relatively minor adaptations or additions were made (Appendix II). For example, Lafrati  
19 attempted to overcome positive sampling bias by weighting outcome values at 65%; this estimate  
20 equating to the centre's overall reported success rate at helping people overcome addiction during  
21 the relevant time period [27]. Furthermore, the analysis for this study adopted a socio-political  
22 approach which focused on monetary savings at the societal level rather than personal outcomes.  
23 This approach was adopted in recognition that, under the prevailing neo-liberalism ideology in the  
24 UK, funding interventions aimed at those considered by society to be less "deserving" may make it  
25 challenging to attract ongoing funding unless a convincing case can be made for a reduction in  
26 welfare and other types of government spending (e.g. court costs, doctor and emergency room  
27 visits).

1  
2  
3 The inputs for SROI for beneficiaries is rarely calculated in SROI studies. However, Kennedy and  
4  
5 Philips added beneficiaries travel expenses to intervention inputs in recognition of the financial  
6  
7 contributions' beneficiaries made towards their own recovery [26]. Scharlach went a step further,  
8  
9 calculating the social return for beneficiaries based on their membership fees to a volunteer-assisted  
10  
11 service for vulnerable, predominantly low income, community-dwelling older people [29]. In another  
12  
13 minor adaption for a SROI based on three interventions by different organisations to support people  
14  
15 with dementia, Willis et al. calculated weightings for all financial proxies to address differences in  
16  
17 the frequency and duration of support across the intervention groups [30].  
18  
19  
20  
21  
22  
23  
24

### 25 *Quality Assessment*

26  
27 The quality assessment focused on the quality of reporting and was undertaken independently by  
28  
29 two reviewers (CH, DF). The degree of inter-rater reliability was measured using Cohen's Kappa,  
30  
31 which considers the role of chance in inter-rater agreement [31]. The degree of agreement between  
32  
33 the two reviewers was calculated before and after discussion. Kappa prior to discussion scored 0.557  
34  
35 (moderate agreement), while following discussion substantial agreement was reached (0.738). Any  
36  
37 item with remaining disagreement between raters following discussion was scored as 'not clear'. As  
38  
39 not all items in the quality assessment were relevant for each paper, quality scores are also reported  
40  
41 as a percentage. The overall quality ratings of the studies ranged from 38% to 90% with a mean of  
42  
43  
44  
45  
46  
47  
48  
49  
50  
51  
52  
53  
54  
55  
56  
57  
58  
59  
60  
65%.

In overview, papers were strong in several areas including: posing a well-defined research question  
(all), their reason for using SROI (all), providing relevant background literature to justify their study  
(all), selecting an appropriate study design (7), clearly valuing inputs (7), and reporting limitations  
and biases (7). There was more variation, and most studies were poorer, at justifying the range of

1  
2  
3 stakeholders included (4), justifying their sample sizes (3) (or clearly reporting sample sizes), and  
4  
5 reporting whether informed consent was obtained (3). Furthermore, there was a strong bias  
6  
7 towards positive outcomes with negative or unintended outcomes rarely reported (2). Only two  
8  
9 papers reported the details of their sensitivity analysis [25,28]. An additional paper reported that  
10  
11 they had conducted sensitivity analysis but reported no details other than that “the SROI ratio did  
12  
13 not change substantially” [26: p.18] The lack of sensitivity analysis raises the likelihood of bias in the  
14  
15 final reported SROI ratio as the impact of various assumptions throughout a study is unknown.  
16  
17  
18  
19 There was an issue with scoring some of the quality framework criteria, as some criteria had two  
20  
21 aspects and one might be met but not the other (e.g. a study may have listed the range of  
22  
23 stakeholders included but not justified why certain stakeholders were included and others  
24  
25 excluded). In the review, both aspects of the criteria had to be met before a point was awarded.  
26  
27  
28 Unlike in the grey literature where the majority of SROI studies are published [12], word count  
29  
30 limitations are a reality of academic publishing. The included papers varied from approximately 2900  
31  
32 words [23], to approximately 7500 words [25]. However, we identified no relationship between  
33  
34 word count and quality ratings (Appendix II).  
35  
36  
37  
38  
39  
40

## 41 **DISCUSSION**

42  
43  
44 Our study closely followed the associated published systematic review protocol [20]. Overall, it was  
45  
46 found that there has been little uptake of SROI methodology by academics in the health and social  
47  
48 care sector to date. Predominantly academics, like SROI consultants and organisations, have used  
49  
50 the existing and well-established guide to SROI methodology by Nicholls et al. as a framework for  
51  
52 conducting their studies [13]. There has been little evidence of academics developing the SROI  
53  
54 methodology with only a range of small adaptations or additions to the usual methodology. Perhaps  
55  
56  
57  
58  
59  
60

1  
2  
3 due to budgetary constraints/limited resources available to conduct SROI studies, the majority used  
4 financial proxies identified from the existing literature. Only one study conducted value games in  
5 order to derive financial proxies that considered the values of stakeholders [25]. However, given that  
6 this study was the only eligible study conducted in a developing country, existing financial proxies  
7 from developed countries would likely be less relevant and appropriate in this context; necessitating  
8 this additional work to develop bespoke financial proxies.  
9

10  
11  
12  
13  
14  
15  
16  
17 As academics have only recently started to use SROI methodology, there was only a relatively small  
18 number of qualifying studies included in this systematic review. As such it is perhaps too early to be  
19 determining the extent to which SROI methodology has been adopted by academics working in  
20 health and social care. This review only included peer reviewed papers due to the focus on academic  
21 contribution to the methodology, so we were not able to determine the proportion of SROI studies  
22 in health and social care that were peer-reviewed rather than published as grey literature. However,  
23 we note that other authors have identified peer-reviewed SROI studies to be between 1% of all SROI  
24 studies [12] and 10% of those in public health [16]. There may be other sectors in which academics  
25 have been earlier adopters of this methodology but, perhaps due to concerns about the value and  
26 relevancy of SROI methodology, which can be highly context specific [16], health and social care  
27 academics has been slow to adopt this as part of their toolkit for developing an evaluation evidence  
28 base.  
29  
30  
31  
32  
33  
34  
35  
36  
37  
38  
39  
40  
41  
42  
43  
44

45 The quality assessment framework developed for the assessment of SROI studies was a useful tool  
46 for comparing the quality of reporting amongst studies [20]. However, our study suggested further  
47 refinement may be necessary. In particular, some items may need to be broken down into two items  
48 or half points awarded (e.g. 'were the proxies valid and comprehensive?', 'was the sample described  
49 in detail/was the sample justified?'). Overall we observed a number of positivity biases in the  
50 studies, relating to sampling and the outcomes that were included in SROI calculations. Few studies  
51  
52  
53  
54  
55  
56  
57



1  
2  
3 noted negative outcomes as the result of the interventions under study, or even unexpected  
4 outcomes; whether positive or negative. Furthermore, few studies reported having undertaken  
5 sensitivity analysis and therefore this decreases confidence in the SROI ratios presented.  
6  
7  
8

9  
10 Common weaknesses in reporting (e.g. justifying stakeholder scope, reporting sample sizes and  
11 whether consent had been obtained) related to papers of different word counts. Weaknesses in  
12 reporting clarity therefore did not seem to relate to word count limitations with some shorter  
13 papers scoring higher than more lengthy ones. Given that most papers cited supplementary  
14 materials, appendices and external links, it seems that full transparency of how SROI was conducted  
15 is challenging to achieve within peer reviewed journals word count limits; though clarity for readers  
16 is likely improved by the more detailed components of the analysis not being included in the main  
17 text. It may be that the positivist evidence hierarchies of academia do not align with SROI  
18 methodology in which personal experiences and outcomes are privileged [14]. However, if SROI  
19 methodology becomes as accepted in other countries as it has been in the UK by government and  
20 policy making bodies [12], this may drive wider take up and adoption of SROI methodology by  
21 academics and other stakeholders in Australia and elsewhere.  
22  
23  
24  
25  
26  
27  
28  
29  
30  
31  
32  
33  
34  
35  
36  
37  
38  
39  
40

41 **Patient and public involvement:** This paper details a systematic review and therefore there was no  
42 direct patient or public involvement. However, participants with disability in the broader research  
43 project have been involved since the inception and have contributed to the objectives outlined in  
44 this systematic review.  
45  
46  
47  
48

49  
50 **Author contributions:** CH, AB and JR conceived the study and were responsible for the design and  
51 search strategy. DF was responsible for conducting the search. CH, DF and SGH conducted the  
52 screening. CH and DF extracted the data, conducted the data analysis and quality assessment. The  
53  
54  
55  
56  
57  
58  
59  
60

1  
2  
3 initial draft of the manuscript was prepared by CH and DF and then circulated to all authors for  
4  
5 critical revision. All authors approved the final draft for submission.  
6  
7

8 **Funding:** This work was supported by the Lifeline Support Authority grant number GA00040.  
9

10  
11 **Competing interests:** None  
12

13  
14 **Provenance and peer review:** Not commissioned; externally peer reviewed.  
15

16  
17 **Data sharing statement:** There are no additional data available.  
18  
19

## 20 21 22 23 REFERENCES

- 24  
25  
26 1. Barraket J, Collyer N, O'Connor M, Anderson H. Finding Australia's social enterprise sector. Report  
27  
28 for the Australian Centre for Philanthropy Nonprofit Studies, Social Traders, Melbourne;  
29  
30 2010.  
31  
32 2. Department of Health. Measuring social value - how five social enterprises did it. London: The  
33  
34 Stationery Office, 2010.  
35  
36 3. Millar R, Hall K. Social return on investment (SROI) and performance measurement: The  
37  
38 opportunities and barriers for social enterprises in health and social care. *Public*  
39  
40 *Management Review* 2013;15(6):923-41.  
41  
42 4. Roy MJ, Donaldson C, Baker R, et al. Social enterprise: New pathways to health and well-being?  
43  
44 *Journal of Public Health Policy* 2013;34(1):55-68.  
45  
46 5. Miller R, Hall K, Millar R. Right to Request social enterprises: a welcome addition to third sector  
47  
48 delivery of English healthcare? *Voluntary Sector Review* 2012;3(2):275-85.  
49  
50 6. UK Government. Social Enterprise: Market Trends 2017. London: Department for Digital, Culture,  
51  
52  
53  
54  
55  
56  
57  
58  
59  
60  
Media and Sport, and Department for Business, Energy and Industrial Strategy,

- 1  
2  
3 [https://www.gov.uk/government/uploads/system/uploads/attachment\\_data/file/644266/](https://www.gov.uk/government/uploads/system/uploads/attachment_data/file/644266/MarketTrends2017report_final_sept2017.pdf)  
4  
5 [MarketTrends2017report\\_final\\_sept2017.pdf](https://www.gov.uk/government/uploads/system/uploads/attachment_data/file/644266/MarketTrends2017report_final_sept2017.pdf), 2017.  
6  
7
- 8 7. Australia Government. Australian Innovation System Report: Chapter 5: Public Sector and Social  
9  
10 Innovation. Canberra: Department of Industry Innovation, Sciences, Research and Tertiary  
11  
12 Education, [https://industry.gov.au/Office-of-the-Chief-](https://industry.gov.au/Office-of-the-Chief-Economist/Publications/Policy/AustralianInnovationSystemReport/AISR2011/chapter-5-public-sector-and-social-innovation/social-innovation-in-australia/index.html)  
13  
14 [Economist/Publications/Policy/AustralianInnovationSystemReport/AISR2011/chapter-5-](https://industry.gov.au/Office-of-the-Chief-Economist/Publications/Policy/AustralianInnovationSystemReport/AISR2011/chapter-5-public-sector-and-social-innovation/social-innovation-in-australia/index.html)  
15  
16 [public-sector-and-social-innovation/social-innovation-in-australia/index.html](https://industry.gov.au/Office-of-the-Chief-Economist/Publications/Policy/AustralianInnovationSystemReport/AISR2011/chapter-5-public-sector-and-social-innovation/social-innovation-in-australia/index.html), 2011.  
17  
18
- 19 8. Barraket J, Collyer N, O'Connor M, et al. Finding Australia's social enterprise sector. *Report for the*  
20  
21 *Australian Centre for Philanthropy and Nonprofit Studies, Social Traders, Melbourne* 2010  
22  
23
- 24 9. British Council. Social enterprise in Vietnam: concept, context and policies. Hanoi, Vietnam:  
25  
26 [https://www.britishcouncil.org/sites/default/files/vietnam\\_report.pdf](https://www.britishcouncil.org/sites/default/files/vietnam_report.pdf), 2012.  
27  
28
- 29 10. British Council. The state of social enterprise in Bangladesh, Ghana, India and Pakistan.  
30  
31 Manchester, UK. [https://www.britishcouncil.org/society/social-enterprise/news-](https://www.britishcouncil.org/society/social-enterprise/news-events/reports-survey-social-enterprise-BGD-GHA-IND-PAK2016)  
32  
33 [events/reports-survey-social-enterprise-BGD-GHA-IND-PAK2016](https://www.britishcouncil.org/society/social-enterprise/news-events/reports-survey-social-enterprise-BGD-GHA-IND-PAK2016), 2016.  
34  
35
- 36 11. Moody M, Littlepage L, Paydar N. Measuring Social Return on Investment: lessons from  
37  
38 organisational implementation of SROI in the Netherlands and the United States. *Nonprofit*  
39  
40 *Management and Leadership* 2015;26(1):19-37.  
41  
42
- 43 12. Krlev G, Münscher R, Mülbart K. Social Return on Investment (SROI): state-of-the-art and  
44  
45 perspectives-a meta-analysis of practice in Social Return on Investment (SROI) studies  
46  
47 published 2002-2012. 2013  
48
- 49 13. Nicholls J, Lawlor E, Neitzert E, et al. A Guide to Social Return on Investment. The Office of the  
50  
51 Third Sector (OTS): Government of Scotland, UK, 2012.  
52  
53
- 54 14. Arvidson M, Lyon F, McKay S, et al. The ambitions and challenges of SROI. TSRC, Birmingham,  
55  
56 2010  
57  
58  
59  
60

- 1  
2  
3 15. Arvidson M, Lyon F. Social impact measurement and non-profit organisations: compliance,  
4  
5 resistance, and promotion. *VOLUNTAS: International Journal of Voluntary and Nonprofit*  
6  
7 *Organizations* 2014;25(4):869-86.  
8  
9
- 10 16. Banke-Thomas AO, Madaj B, Charles A, et al. Social Return on Investment (SROI) methodology to  
11  
12 account for value for money of public health interventions: a systematic review. *BMC Public*  
13  
14 *Health* 2015;15(1):582.  
15  
16
- 17 17. Mulgan G. Measuring social value. *Stanford Social Innovation Review* 2010;8(3):38-43.  
18
- 19 18. Pathak P, Dattani P. Social return on investment: three technical challenges. *Social Enterprise*  
20  
21 *Journal* 2014;10(2):91-104.  
22  
23
- 24 19. Social Ventures Australia Consulting. Social Return on Investment: Lessons learned in Australia,  
25  
26 2012.  
27
- 28 20. Hutchinson CL, Berndt A, Gilbert-Hunt S, George S, Ratcliffe J. Valuing the impact of health and  
29  
30 social care programmes using social return on investment analysis: how have academics  
31  
32 advanced the methodology? A protocol for a systematic review of peer-reviewed literature.  
33  
34 *BMJ Open*. 2018;8(12):e022534.  
35  
36
- 37 21. Shamseer L, Moher D, Clarke M, et al. Preferred reporting items for systematic review and meta-  
38  
39 analysis protocols (PRISMA-P) 2015: elaboration and explanation. *BMJ: British Medical*  
40  
41 *Journal* 2015;2(349):g7647.  
42  
43
- 44 22. *Covidence systematic review software, veritas health innovation*. Melbourne, Australia. Available  
45  
46 at [www.covidence.org](http://www.covidence.org)  
47  
48
- 49 23. Laing CM, Moules NJ. Social Return on Investment: A New Approach to Understanding and  
50  
51 Advocating for Value in Healthcare. *Jona: The Journal of Nursing Administration*  
52  
53 2017;47(12):623-28.  
54  
55  
56  
57  
58  
59  
60

- 1  
2  
3 24. Arvidson M, Battye F, Salisbury D. The social return on investment in community befriending.  
4  
5 *International Journal of Public Sector Management* 2014;27(3):225-40.  
6  
7  
8 25. Goudet S, Griffiths P, Wainaina C, et al. Social value of a nutritional counselling and support  
9  
10 program for breastfeeding in urban poor settings, Nairobi. *BMC Public Health* 2018;18(1)  
11  
12 doi: 10.1186/s12889-018-5334-8  
13  
14  
15 26. Kennedy, R, Phillips, J. Social Return on Investment (SROI): A Case Study with an Expert Patient  
16  
17 Programme. *SelfCare* 2011;2(11):10-20.  
18  
19  
20 27. Lafrati, S. The investment and regenerative value of addiction treatment. *Drugs and Alcohol*  
21  
22 *Today* 2015;15(1):12-20.  
23  
24  
25 28. Mook L, Chan A, Kershaw D. Measuring Social Enterprise Value Creation. *Nonprofit Management*  
26  
27 *and Leadership* 2015;26(2):189-207.  
28  
29  
30 29. Scharlach, AE. Estimating the Value of Volunteer-Assisted Community-Based Aging Services: A  
31  
32 Case Example, *Home Health Care Services Quarterly* 2015;34(1):46-65. DOI:  
33  
34 10.1080/01621424.2014.999902  
35  
36  
37 30. Willis E, Semple AC, de Waal H. Quantifying the benefits of peer support for people with  
38  
39 dementia: A Social Return on Investment (SROI) study. *Dementia* 2016:1471301216640184.  
40  
41  
42 31. Cohen J. Weighted kappa: Nominal scale agreement provision for scaled disagreement or partial  
43  
44 credit. *Psychological bulletin*. 1968;70(4):213.  
45  
46  
47  
48  
49  
50  
51  
52  
53  
54  
55  
56  
57  
58  
59  
60

Figure 1: PRSIMA Flow Chart

Figure 1: PRISMA Flow Chart

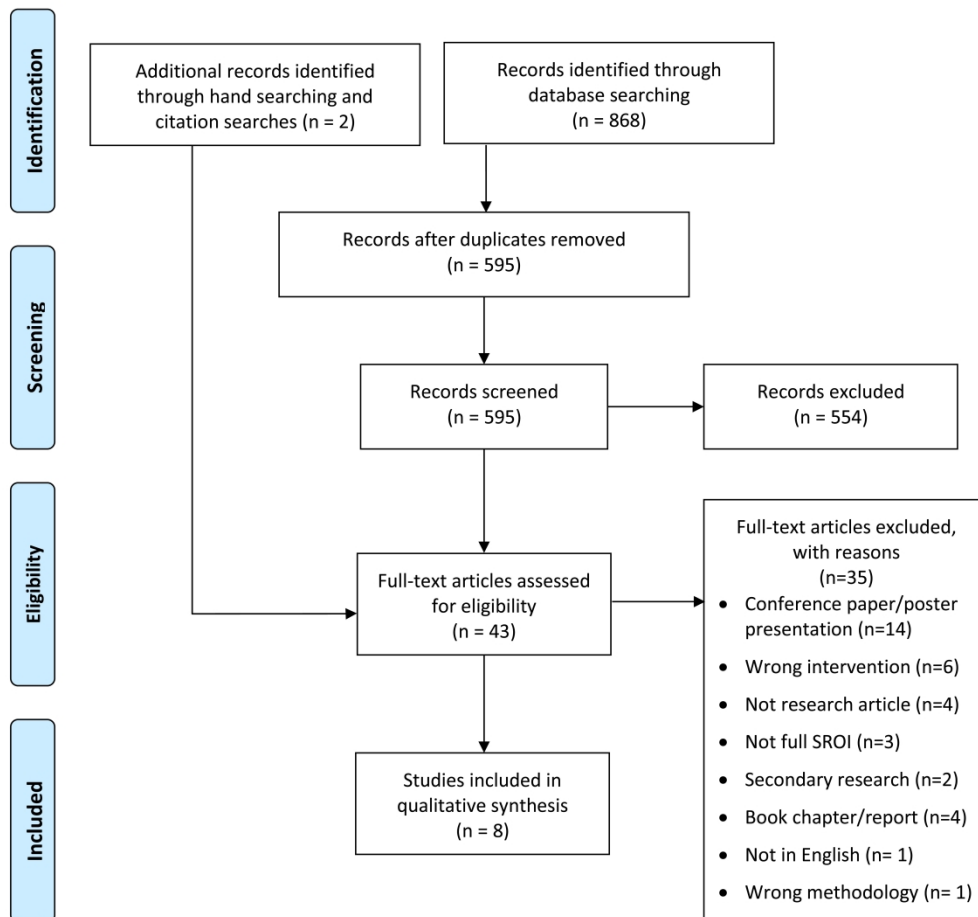

500x506mm (300 x 300 DPI)

## Appendix I: Examples of Search strategy

| Database       | Search Terms                                                                                                                                                                                                                                                                                                                                                                                                                                                                                                     |
|----------------|------------------------------------------------------------------------------------------------------------------------------------------------------------------------------------------------------------------------------------------------------------------------------------------------------------------------------------------------------------------------------------------------------------------------------------------------------------------------------------------------------------------|
| Web of Science | TS={"social return on investment" OR SROI}<br><br>Indexes=SCI-EXPANDED, SSCI, A&HCI, CPCI-S, CPCI-SSH, ESCI, CCR-EXPANDED, IC<br><br>timespan=2000-2018                                                                                                                                                                                                                                                                                                                                                          |
| MEDLINE        | #1 "social return on investment".mp. [mp=title, abstract, original title, name of substance word, subject heading work, keyword heading word, protocol supplementary concept work, rare disease supplementary concept word, unique identifier, synonyms]<br><br>#2 SROI.mp. [mp=title, abstract, original title, name of substance word, subject heading work, keyword heading word, protocol supplementary concept work, rare disease supplementary concept word, unique identifier, synonyms]<br><br>#3 1 or 2 |
| PsychINFO      | #1 "social return on investment".mp. [mp=title, abstract, heading word, table of contents, key concepts, original title, tests & measures]<br><br>#2 SROI.mp. [mp=title, abstract, heading word, table of contents, key concepts, original title, tests & measures]<br><br>#3 1 or 2                                                                                                                                                                                                                             |

## Appendix II: Data Extraction

| Author/date               | Country | Intervention                                                                                                   | Study Design                                                                     | Innovation / adaptations / additions to SROI methodology                                                                                                                                    | Word Count | Externally referenced data                                                                                                                                                                                                       | Quality Assessment |
|---------------------------|---------|----------------------------------------------------------------------------------------------------------------|----------------------------------------------------------------------------------|---------------------------------------------------------------------------------------------------------------------------------------------------------------------------------------------|------------|----------------------------------------------------------------------------------------------------------------------------------------------------------------------------------------------------------------------------------|--------------------|
| Arvidson et al. (2014)    | UK      | Community support for people with post-natal depression                                                        | Mixed methods; primary and secondary data sources                                | Costed in-kind support to calculate how many resources the organisation leverages based on funder investment (£1.30 for each £1)                                                            | 5297       | Refers to the existence of a logic model, dead-weight and drop-off but does not include in article – readers required to email contact author for full report                                                                    | 12/20 (60%)        |
| Goudet et al. (2018)      | Kenya   | Home-based counselling of pregnant and breastfeeding women and mothers of young children                       | Mixed methods; primary data (quantitative and qualitative)                       | None identified                                                                                                                                                                             | 7577       | Online links to full data set; additional file attached to online journal article containing steps in the program, content of counselling messages, full list of stakeholders, and assumptions for base case scenario variables. | 18/20 (90%)        |
| Kennedy & Phillips (2011) | UK      | Community-based self-management training and support groups for people affected by substance and alcohol abuse | Primary data sources (interviews and questionnaire); Post-intervention data only | Beneficiary costs not typically included in SROI analysis. Authors included participants travel expenses to attend the intervention as an input.                                            | 3209       | Downloadable supplementary information: stakeholders, questionnaires, and impact map                                                                                                                                             | 14/20 (70%)        |
| Iafrati (2015)            | UK      | Residential drug addiction treatment centre                                                                    | Pre/post primary data; quantitative and qualitative                              | Outcomes weighted at 65% (overall reported success rate of intervention according to organisation) to address positive sample bias<br><br>Focus on societal impacts under a socio-political | 3904       | None                                                                                                                                                                                                                             | 8/21 (38%)         |



|                       |        |                                                                                                                                    |                                                                      |                                                                                                                                                          |      |                                                                                                                                                                                                           |             |
|-----------------------|--------|------------------------------------------------------------------------------------------------------------------------------------|----------------------------------------------------------------------|----------------------------------------------------------------------------------------------------------------------------------------------------------|------|-----------------------------------------------------------------------------------------------------------------------------------------------------------------------------------------------------------|-------------|
|                       |        |                                                                                                                                    |                                                                      | framework rather than consumers personal outcomes                                                                                                        |      |                                                                                                                                                                                                           |             |
| Laing & Moules (2017) | Canada | Camp for children with cancer                                                                                                      | Post intervention data collection                                    | None identified                                                                                                                                          | 2919 | Supplemental digital content (permalink through journal) – link to relevant table provided in-text. Link contains additional information about the theory of change, deadweight, indicators, and proxies. | 14/20 (70%) |
| Mook et al. (2015)    | Canada | Furniture bank for people transitioning out of homelessness, women and children escaping abusive situations, migrants and refugees | Post intervention, retrospective case worker surveys; secondary data | None identified                                                                                                                                          | 6446 | None                                                                                                                                                                                                      | 12/20 (60%) |
| Scharlach (2015)      | USA    | Volunteer-assisted services for vulnerable older people living in the community                                                    | Pre/post assessment and interview data                               | An SROI ratio was calculated for service users based on membership fees                                                                                  | 6076 | None                                                                                                                                                                                                      | 10/21 (48%) |
| Willis et al. (2016)  | UK     | Peer-support groups for people with dementia (3 groups ran by different organisations)                                             | Post-intervention data through interviews and focus groups           | Weightings were applied to financial proxies to reflect that the 3 groups in the study met for different lengths of time and with different frequencies. | 3842 | External full SROI report – linked in the reference list of article (broken link). Full report contains additional information about stakeholders, inputs, deadweight, indicators and proxies             | 17/20 (85%) |

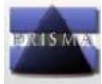

# PRISMA 2009 Checklist

| Section/topic                      | #  | Checklist item                                                                                                                                                                                                                                                                                              | Reported on page # |
|------------------------------------|----|-------------------------------------------------------------------------------------------------------------------------------------------------------------------------------------------------------------------------------------------------------------------------------------------------------------|--------------------|
| <b>TITLE</b>                       |    |                                                                                                                                                                                                                                                                                                             |                    |
| Title                              | 1  | Identify the report as a systematic review, meta-analysis, or both.                                                                                                                                                                                                                                         | 2                  |
| <b>ABSTRACT</b>                    |    |                                                                                                                                                                                                                                                                                                             |                    |
| Structured summary                 | 2  | Provide a structured summary including, as applicable: background; objectives; data sources; study eligibility criteria, participants, and interventions; study appraisal and synthesis methods; results; limitations; conclusions and implications of key findings; systematic review registration number. | 2-3                |
| <b>INTRODUCTION</b>                |    |                                                                                                                                                                                                                                                                                                             |                    |
| Rationale                          | 3  | Describe the rationale for the review in the context of what is already known.                                                                                                                                                                                                                              | 5-6                |
| Objectives                         | 4  | Provide an explicit statement of questions being addressed with reference to participants, interventions, comparisons, outcomes, and study design (PICOS).                                                                                                                                                  | 6                  |
| <b>METHODS</b>                     |    |                                                                                                                                                                                                                                                                                                             |                    |
| Protocol and registration          | 5  | Indicate if a review protocol exists, if and where it can be accessed (e.g., Web address), and, if available, provide registration information including registration number.                                                                                                                               | 6                  |
| Eligibility criteria               | 6  | Specify study characteristics (e.g., PICOS, length of follow-up) and report characteristics (e.g., years considered, language, publication status) used as criteria for eligibility, giving rationale.                                                                                                      | 7                  |
| Information sources                | 7  | Describe all information sources (e.g., databases with dates of coverage, contact with study authors to identify additional studies) in the search and date last searched.                                                                                                                                  | 7                  |
| Search                             | 8  | Present full electronic search strategy for at least one database, including any limits used, such that it could be repeated.                                                                                                                                                                               | 7                  |
| Study selection                    | 9  | State the process for selecting studies (i.e., screening, eligibility, included in systematic review, and, if applicable, included in the meta-analysis).                                                                                                                                                   | 7                  |
| Data collection process            | 10 | Describe method of data extraction from reports (e.g., piloted forms, independently, in duplicate) and any processes for obtaining and confirming data from investigators.                                                                                                                                  | 8                  |
| Data items                         | 11 | List and define all variables for which data were sought (e.g., PICOS, funding sources) and any assumptions and simplifications made.                                                                                                                                                                       | 8                  |
| Risk of bias in individual studies | 12 | Describe methods used for assessing risk of bias of individual studies (including specification of whether this was done at the study or outcome level), and how this information is to be used in any data synthesis.                                                                                      | 8                  |
| Summary measures                   | 13 | State the principal summary measures (e.g., risk ratio, difference in means).                                                                                                                                                                                                                               | N/A                |
| Synthesis of results               | 14 | Describe the methods of handling data and combining results of studies, if done, including measures of consistency (e.g., $I^2$ ) for each meta-analysis.                                                                                                                                                   | 8-9                |

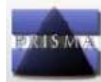

# PRISMA 2009 Checklist

Page 1 of 2

| Section/topic                 | #  | Checklist item                                                                                                                                                                                           | Reported on page # |
|-------------------------------|----|----------------------------------------------------------------------------------------------------------------------------------------------------------------------------------------------------------|--------------------|
| Risk of bias across studies   | 15 | Specify any assessment of risk of bias that may affect the cumulative evidence (e.g., publication bias, selective reporting within studies).                                                             | 10                 |
| Additional analyses           | 16 | Describe methods of additional analyses (e.g., sensitivity or subgroup analyses, meta-regression), if done, indicating which were pre-specified.                                                         | N/A                |
| <b>RESULTS</b>                |    |                                                                                                                                                                                                          |                    |
| Study selection               | 17 | Give numbers of studies screened, assessed for eligibility, and included in the review, with reasons for exclusions at each stage, ideally with a flow diagram.                                          | 9 & Figure 1       |
| Study characteristics         | 18 | For each study, present characteristics for which data were extracted (e.g., study size, PICOS, follow-up period) and provide the citations.                                                             | 9 & Table 2        |
| Risk of bias within studies   | 19 | Present data on risk of bias of each study and, if available, any outcome level assessment (see item 12).                                                                                                | 12-13 & Table 2    |
| Results of individual studies | 20 | For all outcomes considered (benefits or harms), present, for each study: (a) simple summary data for each intervention group (b) effect estimates and confidence intervals, ideally with a forest plot. | 10-12              |
| Synthesis of results          | 21 | Present results of each meta-analysis done, including confidence intervals and measures of consistency.                                                                                                  | N/A                |
| Risk of bias across studies   | 22 | Present results of any assessment of risk of bias across studies (see Item 15).                                                                                                                          | N/A                |
| Additional analysis           | 23 | Give results of additional analyses, if done (e.g., sensitivity or subgroup analyses, meta-regression [see Item 16]).                                                                                    | N/A                |
| <b>DISCUSSION</b>             |    |                                                                                                                                                                                                          |                    |
| Summary of evidence           | 24 | Summarize the main findings including the strength of evidence for each main outcome; consider their relevance to key groups (e.g., healthcare providers, users, and policy makers).                     | 13-14              |
| Limitations                   | 25 | Discuss limitations at study and outcome level (e.g., risk of bias), and at review-level (e.g., incomplete retrieval of identified research, reporting bias).                                            | 14-15              |
| Conclusions                   | 26 | Provide a general interpretation of the results in the context of other evidence, and implications for future research.                                                                                  | 15                 |
| <b>FUNDING</b>                |    |                                                                                                                                                                                                          |                    |
| Funding                       | 27 | Describe sources of funding for the systematic review and other support (e.g., supply of data); role of funders for the systematic review.                                                               | 16                 |

From: Moher D, Liberati A, Tetzlaff J, Altman DG, The PRISMA Group (2009). Preferred Reporting Items for Systematic Reviews and Meta-Analyses: The PRISMA Statement. PLoS Med 6(7): e1000097. doi:10.1371/journal.pmed1000097

For peer review only: <http://onlinelibrary.wiley.com/doi/10.1136/bmjopen-2015-002114> For more information, visit [www.prisma-statement.org](http://www.prisma-statement.org)

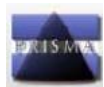

# PRISMA 2009 Checklist

For peer review only

- 1
- 2
- 3
- 4
- 5
- 6
- 7
- 8
- 9
- 10
- 11
- 12
- 13
- 14
- 15
- 16
- 17
- 18
- 19
- 20
- 21
- 22
- 23
- 24
- 25
- 26
- 27
- 28
- 29
- 30
- 31
- 32
- 33
- 34
- 35
- 36
- 37
- 38
- 39
- 40
- 41
- 42
- 43
- 44
- 45
- 46
- 47

# BMJ Open

## Valuing the impact of health and social care programs using social return on investment analysis: how have academics advanced the methodology? A systematic review

|                                 |                                                                                                                                                                                                                                                                                                                                                                                                                                                                                     |
|---------------------------------|-------------------------------------------------------------------------------------------------------------------------------------------------------------------------------------------------------------------------------------------------------------------------------------------------------------------------------------------------------------------------------------------------------------------------------------------------------------------------------------|
| Journal:                        | <i>BMJ Open</i>                                                                                                                                                                                                                                                                                                                                                                                                                                                                     |
| Manuscript ID                   | bmjopen-2019-029789.R1                                                                                                                                                                                                                                                                                                                                                                                                                                                              |
| Article Type:                   | Research                                                                                                                                                                                                                                                                                                                                                                                                                                                                            |
| Date Submitted by the Author:   | 01-Jul-2019                                                                                                                                                                                                                                                                                                                                                                                                                                                                         |
| Complete List of Authors:       | Hutchinson, Claire; Flinders University, Nursing & Health Sciences<br>Berndt, Angela; University of South Australia Division of Health Sciences<br>Forsythe, Deborah; University of South Australia Division of Health Sciences<br>Gilbert-Hunt, Susan; University of South Australia Division of Health Sciences<br>George, Stacey; Flinders University Faculty of Medicine Nursing and Health Sciences<br>Ratcliffe, Julie; Flinders University, Flinders Clinical Effectiveness; |
| <b>Primary Subject Heading</b>: | Health informatics                                                                                                                                                                                                                                                                                                                                                                                                                                                                  |
| Secondary Subject Heading:      | Health services research                                                                                                                                                                                                                                                                                                                                                                                                                                                            |
| Keywords:                       | HEALTH ECONOMICS, Social care, social impact, social return on investment, SROI                                                                                                                                                                                                                                                                                                                                                                                                     |
|                                 |                                                                                                                                                                                                                                                                                                                                                                                                                                                                                     |

SCHOLARONE™  
Manuscripts

1  
2  
3 **Valuing the impact of health and social care programs using social return on investment analysis:**  
4 **how have academics advanced the methodology? A systematic review**  
5  
6  
7

8 Claire Hutchinson\*

9 School of Health Sciences, University of South Australia, GPO Box 2471, Adelaide SA 5001, Australia

10 Health and Social Care Economics Group, College of Nursing and Health Sciences, Flinders University,  
11 GPO Box 2100, Adelaide, SA 5001, Australia, [claire.hutchinson@flinders.edu.au](mailto:claire.hutchinson@flinders.edu.au), Tel: +618 8201 3591

12  
13  
14  
15 Angela Berndt

16 School of Health Sciences, University of South Australia, GPO Box 2471, Adelaide SA 5001, Australia

17  
18  
19  
20  
21 Deborah Forsythe

22 School of Health Sciences, University of South Australia, GPO Box 2471, Adelaide SA 5001, Australia

23  
24  
25  
26 Susan Gilbert-Hunt

27 International Centre for Allied Health Evidence, School of Health Sciences, University of South  
28 Australia, GPO Box 2471, Adelaide SA 5001, Australia

29  
30  
31  
32  
33 Stacey George

34 College of Nursing and Health Sciences, Flinders University, GPO Box 2100, Adelaide SA 5001,  
35 Australia

36  
37  
38  
39  
40 Julie Ratcliffe

41 Institute for Choice, UniSA Business School, University of South Australia, GPO Box 2471, Adelaide SA  
42 5001, Australia

43 Health and Social Care Economics Group, College of Nursing and Health Sciences, Flinders University,  
44 GPO Box 2100, Adelaide, SA 5001, Australia

45  
46  
47  
48  
49 \*corresponding author

50  
51 **Word count:** 3419

52  
53 **Abstract word count:** 282

54  
55 **Number of references:** 31

## ABSTRACT

**Objectives:** To identify how social return on investment analysis (SROI)– traditionally used by business consultants - has been interpreted, used and innovated by academics in the health and social care sector and to assess the quality of peer-reviewed SROI studies in this sector.

**Design:** Systematic review

**Settings:** Community and residential settings.

**Participants:** A wide range of demographic groups and age groups.

**Results:** The following databases were searched: Web of Science, Scopus, CINAHL, Econlit, Medline, PsychINFO, Embase, Emerald, Social Care Online, and the National Institute for Health and Care Excellence. Limited uptake of social return on investment methodology by academics was found in the health and social care sector. From 868 papers screened, 8 studies met the criteria for inclusion in this systematic review. Study quality was found to be highly variable, ranging from 38%-90% based on scores from a purpose-designed quality assessment tool. In general, relatively high consistency and clarity was observed in the reporting of the research question, reasons for using this methodology and justifying the need for the study. However, weaknesses were observed in other areas including justifying stakeholders, reporting sample sizes, undertaking sensitivity analysis and reporting unexpected or negative outcomes. Most papers cited links to additional materials to aid in reporting. There was little evidence that academics had innovated or advanced the methodology beyond that outlined in a much-cited social return on investment guide.

**Conclusion:** Academics have thus far been slow to adopt social return on investment methodology in the evaluation of health and social care interventions, and there is little evidence of innovation and development of the methodology. The word count requirements of peer-reviewed journals may

1  
2  
3 make it difficult for authors to be fully transparent about the details of their studies, potentially  
4  
5 impacting the quality of reporting in those studies published in these journals.  
6  
7

8 **Keywords:** health economics, social care, social impact, social return on investment, SROI  
9  
10

### 11 12 13 14 15 **Strengths and limitations of this study**

- 16 • The first systematic review to examine the contribution of academics to social return on  
17 investment methodology in the context of the health and social care sector.  
18
- 19 • The study reviewed the use of social return on investment methodology across a broad  
20 range of settings, interventions and participants in the health and social care sector.  
21
- 22 • A useful quality assessment framework tool for comparing the quality of reporting SROI  
23 studies was developed, however refinement of the tool may be necessary to improve clarity.  
24
- 25 • The review does not incorporate findings of studies published in the grey literature or non-  
26 peer reviewed journals, and hence cannot comment on the uptake of social return on  
27 investment methodology in health and social care studies more broadly.  
28  
29  
30  
31  
32  
33  
34  
35  
36  
37  
38  
39  
40  
41  
42  
43  
44  
45  
46  
47  
48  
49  
50  
51  
52  
53  
54  
55  
56  
57  
58  
59  
60



## BACKGROUND

Social enterprises offer an alternative model to non-profit organisations whereby market focuses are used to provide public or community benefit [1]. The number of social enterprise organisations operating in the health and social care sectors have seen a growth over the last decade [2-4]. This includes developed countries such as the UK and Australia [5-6], as well as developing nations such as Pakistan, Ghana and Vietnam [7-10]. The health and social care sector has been estimated to represent 20-30% of all social enterprise [7-10].

The measurement and valuation of outcomes can provide important information for social enterprises' stakeholders in assessing that funding is maximising social impact [11]. Social return on investment (SROI) methodology allows for values to be placed on personal, social and community outcomes which has not hitherto been possible with more established forms of economic evaluation [12,13].

With SROI methodology, social value is estimated by the allocation of financial proxy values to outcomes identified in an intervention's logic model (known as the theory of change). SROI is expressed as a ratio of the adjusted value of benefits divided by total investment. Adjustments to social value are made based on estimations of deadweight (what would have occurred anyway), displacement (what activities were displaced by the intervention), attribution (what other organisations contributed to the outcomes) and drop off (whether the outcomes experienced decline over time). Costs and benefits that occur at different time points are made comparable by adjusting for inflation in order to calculate net present value [13]. As an example, a SROI ratio of 4:1 illustrates that, following appropriate adjustments, \$4 of social value was created for each dollar invested.

1  
2  
3 The methodology was initially developed in 2000, and the extant literature acknowledges strengths  
4 as well as challenges [4,11,14-18]. Strengths include: engagement with stakeholders, the identifying  
5 and valuing of outcomes which may be unique but considered valuable to beneficiaries, how the  
6 process reinforces mission and can lead to organisational learning, and the generation of a simple  
7 ratio which is easily comprehended [14,16,18]. However, weaknesses at the philosophical,  
8 theoretical and practical level have been noted. Philosophically the monetisation of outcomes may  
9 be at odds with the values of social enterprise organisations and, given the potential high cost of  
10 implementing SROI methodology, organisations may find it challenging to justify spending on an  
11 SROI study rather than on program development [3,5]. SROI has been noted to be lack cohesion  
12 from a theoretical perspective. For example, outcomes measurement aligns with a positivist  
13 approach but SROI has been noted to privilege stakeholder perspectives over other types of  
14 evidence [15]; such perspectives align better with social constructivist approaches. Practical  
15 challenges include the difficulties in valuing 'soft' outcomes as well as outcomes experienced at the  
16 societal level - particularly when it comes to addressing 'wicked problems' such as societal inequity  
17 or disadvantage - the difficulties in identifying the counterfactual (what would have happened  
18 anyway), accurately accounting for overheads, and that ratios are highly context specific and cannot  
19 be compared [3,11,14-16,18-20]. Aggravating outcomes into a single figure has also been as  
20 problematic in terms of contract validity and interpretability [19, 21].

21  
22  
23 Since its development, SROI methodology has been most commonly implemented by consultants  
24 [11,12,17]. Consequently, SROI studies are more likely to be reported in the grey literature, if in the  
25 public domain at all. This potentially limits learning from previous studies as well as SROI  
26 methodological development [11,12,22]. Similarly, much of the debate regarding SROI methodology,  
27 particularly around many of the practical issues, occurs outside of academia [21]. There has been a  
28 call for academics to adopt the SROI approach and further develop the methodology [12,14,16,17],

1  
2  
3 as well as a call for greater standardisation [12,14]. One associated effect of methodological  
4  
5 engagement by academics would be an increase in SROI studies being the subject of peer-review.  
6  
7 According to a 2015 systematic review of public health interventions evaluated using social return  
8  
9 on investment methodology, only 10% were published under peer review [16]. One common feature  
10  
11 of SROI studies to date is that of 'assurance'; that is, the process by which information reported is  
12  
13 verified. This process is usually conducted by an SROI consultant external to the study [13,16] and at  
14  
15 additional cost which may be prohibitive for some organisations. With greater academic  
16  
17 involvement in SROI, it would be expected that the peer-review process would replace assurance as  
18  
19 being a more rigorous means of determining the appropriateness of the analysis and the  
20  
21 assumptions on which it is based.  
22  
23  
24  
25

26 This paper seeks to build on the work of the previous systematic review [16] to examine academic  
27  
28 contributions to SROI methodology in studies conducted in the health and social care sector.  
29  
30  
31  
32  
33

### 34 **The current study**

35  
36  
37 This systematic review identifies: (1) the extent to which academics have adopted SROI methodology  
38  
39 in evaluating health and social care programs and interventions; (2) how academics have  
40  
41 interpreted, used and developed SROI methodology; and (3) how academics have reported SROI  
42  
43 studies using a quality review designed for the purpose [23].  
44  
45  
46  
47

### 48 **METHODS**

49  
50  
51  
52 This review was conducted using the Preferred Reporting Items for Systematic Review and Meta-  
53  
54 Analyses (PRISMA) guidelines [24]. The protocol for this systematic review was registered with  
55  
56  
57  
58  
59  
60

1  
2  
3 PROSPERO international prospective register of systematic reviews (number CRD42018080195) and  
4  
5 published following peer-review [23].  
6  
7  
8  
9

#### 10 11 *Patient and public involvement* 12

13 This paper details a systematic review and therefore there was no direct patient or public  
14 involvement. However, participants with disability in the broader research project have been  
15 involved since the inception and have contributed to the objectives outlined in this systematic  
16 review.  
17  
18  
19  
20  
21  
22  
23  
24

#### 25 *Inclusion and exclusion criteria* 26

27 This systematic review focused on SROI studies in health and social care settings; including  
28 interventions providing treatment for physical or mental health conditions and non-medical  
29 interventions to support the social needs of vulnerable populations in a community setting Any age  
30 group or population and all empirical study types were therefore included if this criteria was met.  
31  
32  
33  
34  
35  
36  
37  
38  
39  
40  
41  
42  
43  
44  
45  
46  
47  
48  
49  
50  
51  
52  
53  
54  
55  
56  
57  
58  
59  
60

#### 53 *Search strategy* 54

55 The key word search was limited to “social return on investment” and “SROI” to ensure that studies  
56 using SROI methodology were identified. Electronic searches were based on full text. Due to there  
57 being numerous keyword variations for health and social care, additional key words were not added  
58 but rather all items screened for relevancy.  
59  
60

61 Searches were limited to papers published after the year 2000 to October 1<sup>st</sup> 2018. The following  
62 multi-disciplinary databases were searched: Web of Science, Scopus, CINAHL, Econlit, Medline,  
63  
64  
65  
66  
67  
68  
69  
70

1  
2  
3 PsychINFO, Embase, Emerald, Social Care Online, and the National Institute for Health and Care  
4  
5 Excellence (Appendix I).

### 6 7 8 9 10 *Screening and data extraction*

11 Search results were stored in Covidence systematic review software [25] and duplicate items  
12 removed. Two reviewers independently screened all titles and abstracts against the inclusion criteria  
13 to reduce the risk of bias. A third reviewer screened all titles and abstracts where there was  
14 disagreement between reviewers. Full text manuscripts were obtained for papers that met the  
15 inclusion criteria at initial screening and were again independently reviewed by two reviewers.  
16  
17 Following full text screening, the reference lists of studies shortlisted – plus the reference list of a  
18 previous systematic review [16] – were then hand searched for additional eligible articles and a  
19 citation search was performed on Scopus and Google Scholar.  
20  
21

22  
23 Data on included studies was extracted on the following categories: author, date of publication,  
24 country, intervention, study design, article word count, and type of externally referenced results if  
25 applicable. To address the second and third aim of the review, innovations or adaptations to the  
26 methodology were also identified and quality assessment scores added (Appendix II).  
27  
28  
29  
30  
31  
32  
33  
34  
35  
36  
37  
38  
39  
40  
41  
42

### 43 *Quality assessment*

44 A SROI-specific quality framework was developed for the purpose of this systematic review as it was  
45 identified that there was no relevant established peer reviewed quality framework (Appendix III).  
46  
47 Further details of the quality framework and the processes associated with its development are  
48 presented in a separate paper [23].  
49  
50  
51  
52

53 In brief, the quality framework consists of 21 questions in 6 areas: 1) research question, 2) reason for  
54 using SROI, 3) scope, 4) theory of change/impact map, 5) study design, and 6) analysis. Each item can  
55  
56  
57

1  
2  
3 be scored according to four categories: yes, no, not clear and not applicable. Data not reported was  
4  
5 scored as a 'no', data inadequately reported was scored as 'not clear'. If an aspect of the quality  
6  
7 framework was not relevant to a particular study, it was marked as 'not applicable'.  
8  
9

### 10 11 12 *Data synthesis*

13  
14  
15 Data was synthesised to address the three stated systematic review objectives. To address objective  
16  
17 one, the number of included studies was compared to the findings of a previous systematic review  
18  
19 that included peer-reviewed and grey literature in public health [16], to gain an indication of  
20  
21 whether there has been an increase or decrease in SROI studies in recent years. Data to address  
22  
23 objective two was determined by a review of the adopted methodology compared to that outlined  
24  
25 in the SROI Network's Guide to Social Return on investment [13]. This guide has been established in  
26  
27 previous reviews as the most extensively cited resource for the conducting of SROI studies [12, 16].  
28  
29 Finally, we report findings from our quality review in both table and narrative format, highlighting  
30  
31 key strengths and weaknesses of the included studies. Only the main manuscript and permalink  
32  
33 supplementary information was considered to be part of the peer-reviewed content. As expected,  
34  
35 meta-analysis was not possible due to the heterogeneous nature of the results, however, we report  
36  
37 on identified meta-biases.  
38  
39  
40  
41

42 **Patient and public involvement:** This paper details a systematic review and therefore there was no  
43  
44 direct patient or public involvement. However, participants with disability in the broader research  
45  
46 project have been involved since the inception and have contributed to the objectives outlined in  
47  
48 this systematic review.  
49  
50  
51

## 52 53 **RESULTS**

### 54 55 *Search Results*

1  
2  
3 The initial searches returned 868 items, reduced to 595 items once duplicates were removed (Figure  
4  
5 1). Following independent title and abstract screening by two reviewers, a third reviewer screened  
6  
7 all titles and abstracts where there was disagreement between reviewers (n=63, 10.6%). Full text  
8  
9 manuscripts were obtained for 41 studies that met the inclusion criteria. The full text of each study  
10  
11 was then independently reviewed by two reviewers (CH, DF), resulting in six studies for inclusion.  
12  
13 The searching of reference lists from the included studies and a previous systematic review [15], and  
14  
15 an associated citation search performed on Scopus and Google Scholar, resulted in the identified of  
16  
17 two further studies. The total number of studies included in this systematic review was eight.  
18  
19  
20  
21  
22

### 23 *Study Characteristics*

24  
25 Of the eight SROI studies, the majority were undertaken in developed nations with half conducted in  
26  
27 the UK, two in Canada and one each in the US and Kenya. One intervention was aimed at children  
28  
29 [26], two at pregnant or post-partum women [27,28], two at adults overcoming addiction [29,30],  
30  
31 one at adults and families transitioning from homelessness [31], and two at older people [32,33]. In  
32  
33 conducting their analysis, all but one study [32] referred extensively to the Guide to social return on  
34  
35 investment [13].  
36  
37  
38

39  
40 Though it was expected that peer-reviewed publications would be authored by academics, one  
41  
42 paper was written by a consultant and an organisational representative [29]. The remaining papers  
43  
44 were published by affiliated academics, though some were published in partnership: academics and  
45  
46 consultants [27], and academics and an organisational representative [31]. Two papers highlighted  
47  
48 that their findings had also been assured by an SROI consultant [26,33].  
49  
50

51  
52 The eight SROI peer-reviewed studies were published relatively recently (between 2011 and 2018)  
53  
54 with 3 of these published in 2015. Thereby indicating that academics have thus far been slow to  
55  
56  
57

1  
2  
3 adopt SROI methodology in the evaluation of health and social care interventions given that the  
4 methodology was initially developed in 2000 [3].  
5  
6  
7

8 Potentially due to the limitations imposed by resource constraints, it was observed that data was  
9 gathered from a limited number of stakeholder groups in many studies, most commonly  
10 intervention beneficiaries, though inclusion of some other groups was noted: families or carers  
11 [26,33], volunteers [26,27,33], and paid staff [26,31,32]. One exception was Goudet et al., whose  
12 study included a broad range of stakeholders and a large sample size (over 400) including  
13 beneficiaries, different types of family members, health care providers, and local businesses [28].  
14  
15  
16  
17  
18  
19  
20  
21

22 For studies that included previous beneficiaries of an intervention [26-30,32,33] there was the  
23 potential for positive sample bias, as those for whom the intervention was a success may be more  
24 willing to participate in an evaluation or may be more likely to be put forward for inclusion by the  
25 organisation offering the intervention. Most studies [26-29,31,33] collected data at only one time  
26 point (retrospectively) which limits our understanding of the impact of the intervention, as opposed  
27 to pre-post data collection for example, and also increases the likelihood of memory bias. There was  
28 also a potential positivity bias in the reporting of outcomes, as few studies reported negative  
29 outcomes [27,33].  
30  
31  
32  
33  
34  
35  
36  
37  
38  
39  
40

41 Other than focusing on a limited range of stakeholders, another way to reduce scope and therefore  
42 costs associated with conducting a SROI analysis is to focus on a limited range of outcomes, and to  
43 attribute values based on those identified in the existing literature. Goudet et al. was the only study  
44 that reported using values games with participants to develop bespoke values for outcomes. Value  
45 games are a revealed preference approach whereby participants rank an outcome without a market  
46 value with several items that can be purchased. In this way the value of the outcome can be  
47 estimated as somewhere between the value of the items either side of it in the ranking. Goudet et  
48 al. identified 34 outcomes, which may have impacted upon the final SROI ratios, as the authors  
49  
50  
51  
52  
53  
54  
55  
56  
57  
58  
59  
60



1  
2  
3 reported a significantly higher SROI than all other papers (US\$71 social return for every US\$1  
4 invested) [28]. Other papers reported between two outcomes [31] and 10 outcomes [29] SROI ratios  
5  
6 were between 1.17:1 [33] and 6.09:1 [29]. Notably there was no evidence that authors had used  
7  
8 SROI value banks such as HACT [34] or Global Value Exchange [35] in identifying suitable financial  
9  
10  
11  
12 proxies.

13  
14  
15 Although it was expected that the adoption of SROI methodology by academics may lead to  
16  
17 innovation and development of the methodology [14, 16], there was little evidence of this. However,  
18  
19 some relatively minor adaptations or additions were made (Appendix II). For example, Lafrati  
20  
21 attempted to overcome positive sampling bias by weighting outcome values at 65%; this estimate  
22  
23 equating to the centre's overall reported success rate at helping people overcome addiction during  
24  
25 the relevant time period [30]. Furthermore, the analysis for this study adopted a socio-political  
26  
27 approach which focused on monetary savings at the societal level rather than personal outcomes.  
28  
29 This approach was adopted in recognition that, under the prevailing neo-liberalism ideology in the  
30  
31 UK, funding interventions aimed at those considered by society to be less "deserving" may make it  
32  
33 challenging to attract ongoing funding unless a convincing case can be made for a reduction in  
34  
35 welfare and other types of government spending (e.g. court costs, doctor and emergency room  
36  
37 visits).  
38  
39  
40  
41

42  
43 The inputs for SROI for beneficiaries is rarely calculated in SROI studies. However, Kennedy and  
44  
45 Philips added beneficiaries travel expenses to intervention inputs in recognition of the financial  
46  
47 contributions' beneficiaries made towards their own recovery [29]. Scharlach went a step further,  
48  
49 calculating the social return for beneficiaries based on their membership fees to a volunteer-assisted  
50  
51 service for vulnerable, predominantly low income, community-dwelling older people [32]. In another  
52  
53 minor adaption for a SROI based on three interventions by different organisations to support people  
54  
55  
56  
57  
58  
59  
60

1  
2  
3 with dementia, Willis et al. calculated weightings for all financial proxies to address differences in  
4 the frequency and duration of support across the intervention groups [33].  
5  
6  
7  
8  
9

### 10 11 *Quality Assessment* 12

13  
14 The quality assessment focused on the quality of reporting and was undertaken independently by  
15 two reviewers (CH, DF). The degree of inter-rater reliability was measured using Cohen's Kappa,  
16 which considers the role of chance in inter-rater agreement [36]. The degree of agreement between  
17 the two reviewers was calculated before and after discussion. Kappa prior to discussion scored 0.557  
18 (moderate agreement), while following discussion substantial agreement was reached (0.738). Any  
19 item with remaining disagreement between raters following discussion was scored as 'not clear'. As  
20 not all items in the quality assessment were relevant for each paper, quality scores are also reported  
21 as a percentage. The overall quality ratings of the studies ranged from 38% to 90% with a mean of  
22 65%.  
23  
24  
25  
26  
27  
28  
29  
30  
31  
32  
33

34  
35 In overview, papers were strong in several areas including: posing a well-defined research question  
36 (all), their reason for using SROI (all), providing relevant background literature to justify their study  
37 (all), selecting an appropriate study design (7), clearly valuing inputs (7), and reporting limitations  
38 and biases (7). There was more variation, and most studies were poorer, at justifying the range of  
39 stakeholders included (4), justifying their sample sizes (3) (or clearly reporting sample sizes), and  
40 reporting whether informed consent was obtained (3). Furthermore, there was a strong bias  
41 towards positive outcomes with negative or unintended outcomes rarely reported (2). Only two  
42 papers reported the details of their sensitivity analysis [28,31]. An additional paper reported that  
43 they had conducted sensitivity analysis but reported no details other than that "the SROI ratio did  
44 not change substantially" [29: p.18] The lack of sensitivity analysis raises the likelihood of bias in the  
45  
46  
47  
48  
49  
50  
51  
52  
53  
54  
55  
56  
57  
58  
59  
60

1  
2  
3 final reported SROI ratio as the impact of various assumptions on the SROI estimate throughout a  
4  
5 study is unknown.  
6  
7

8 There was an issue with scoring some of the quality framework criteria, as some criteria had two  
9  
10 aspects and one might be met but not the other (e.g. a study may have listed the range of  
11  
12 stakeholders included but not justified why certain stakeholders were included and others  
13  
14 excluded). In the review, both aspects of the criteria had to be met before a point was awarded.  
15  
16

17 Unlike in the grey literature where the majority of SROI studies are published [12], word count  
18  
19 limitations are a reality of academic publishing. The included papers varied from approximately 2900  
20  
21 words [26], to approximately 7500 words [28]. However, we identified no relationship between  
22  
23 word count and quality ratings (Appendix II).  
24  
25  
26  
27  
28  
29

## 30 **DISCUSSION**

31  
32 Our study closely followed the associated published systematic review protocol [20]. Overall, it was  
33  
34 found that there has been little uptake of SROI methodology by academics in the health and social  
35  
36 care sector to date. Predominantly academics, like SROI consultants and organisations, have used  
37  
38 the existing and well-established guide to SROI methodology by Nicholls et al. as a framework for  
39  
40 conducting their studies [13]. There has been little evidence of academics developing the SROI  
41  
42 methodology with only a range of small adaptations or additions to the usual methodology. Perhaps  
43  
44 due to budgetary constraints/limited resources available to conduct SROI studies, the majority used  
45  
46 financial proxies identified from the existing literature. Though there have been considerable efforts  
47  
48 by SROI practitioners to collate social value banks such as HACT [34] and Global Value Exchange [35],  
49  
50 these studies did not access these resources. Only one study conducted value games in order to  
51  
52 derive financial proxies that considered the values of stakeholders [28]. However, given that this  
53  
54  
55  
56  
57  
58  
59  
60

1  
2  
3 study was the only eligible study conducted in a developing country, existing financial proxies from  
4 developed countries would likely be less relevant and appropriate in this context; necessitating this  
5 additional work to develop bespoke financial proxies.  
6  
7  
8

9  
10 As academics have only recently started to use SROI methodology, there was only a relatively small  
11 number of qualifying studies included in this systematic review. As such it is perhaps too early to be  
12 determining the extent to which SROI methodology has been adopted by academics working in  
13 health and social care. This review only included peer reviewed papers due to the focus on academic  
14 contribution to the methodology, so we were not able to determine the proportion of SROI studies  
15 in health and social care that were peer-reviewed rather than published as grey literature. However,  
16 we note that other authors have identified peer-reviewed SROI studies to be between 1% of all SROI  
17 studies [12] and 10% of those in public health [16]. There may be other sectors in which academics  
18 have been earlier adopters of this methodology but, perhaps due to concerns about the value and  
19 relevancy of SROI methodology, which can be highly context specific [16], health and social care  
20 academics has been slow to adopt this as part of their toolkit for developing an evaluation evidence  
21 base.  
22  
23  
24  
25  
26  
27  
28  
29  
30  
31  
32  
33  
34  
35  
36  
37

38 The quality assessment framework developed for the assessment of SROI studies was a useful tool  
39 for comparing the quality of reporting amongst studies [23]. However, our study suggested further  
40 refinement may be necessary. In particular, some items may need to be broken down into two items  
41 or half points awarded (e.g. 'were the proxies valid and comprehensive?', 'was the sample described  
42 in detail/was the sample justified?'). Overall we observed a number of positivity biases in the  
43 studies, relating to sampling and the outcomes that were included in SROI calculations. Few studies  
44 noted negative outcomes as the result of the interventions under study, or even unexpected  
45 outcomes; whether positive or negative. Furthermore, few studies reported having undertaken  
46 sensitivity analysis and therefore this decreases confidence in the SROI ratios presented.  
47  
48  
49  
50  
51  
52  
53  
54  
55  
56  
57  
58  
59  
60

1  
2  
3 Common weaknesses in reporting (e.g. justifying stakeholder scope, reporting sample sizes and  
4 whether consent had been obtained) related to papers of different word counts. Weaknesses in  
5 reporting clarity therefore did not seem to relate to word count limitations with some shorter  
6 papers scoring higher than more lengthy ones. Given that most papers cited supplementary  
7 materials, appendices and external links, it seems that full transparency of how SROI was conducted  
8 is challenging to achieve within peer reviewed journals word count limits; though clarity for readers  
9 is likely improved by the more detailed components of the analysis not being included in the main  
10 text. It may be that the positivist evidence hierarchies of academia do not align with SROI  
11 methodology in which personal experiences and outcomes are privileged [14]. However, if SROI  
12 methodology becomes as accepted in other countries as it has been in the UK by government and  
13 policy making bodies [12], this may drive wider take up and adoption of SROI methodology by  
14 academics and other stakeholders in Australia and elsewhere.

15  
16  
17  
18  
19  
20  
21  
22  
23  
24  
25  
26  
27  
28  
29  
30  
31  
32  
33 **Author contributions:** CH, AB and JR conceived the study and were responsible for the design and  
34 search strategy which was approved by SGH and SG. DF was responsible for conducting the search.  
35 CH, DF and SGH conducted the screening. CH and DF extracted the data, conducted the data analysis  
36 and quality assessment. The initial draft of the manuscript was prepared by CH and DF and then  
37 circulated to all authors for critical revision. All authors approved the final draft for submission.

38  
39  
40  
41  
42  
43  
44  
45 **Funding:** This work was supported by the Lifeline Support Authority grant number GA00040.

46  
47  
48 **Competing interests:** None

49  
50  
51 **Provenance and peer review:** Not commissioned; externally peer reviewed.

52  
53  
54 **Data sharing statement:** There are no additional data available.

## 55 56 57 REFERENCES

- 1  
2  
3 1. Barraket J, Collyer N, O'Connor M, Anderson H. Finding Australia's social enterprise sector. Report  
4  
5 for the Australian Centre for Philanthropy Nonprofit Studies, Social Traders, Melbourne;  
6  
7 2010.  
8  
9
- 10 2. Department of Health. Measuring social value - how five social enterprises did it. London: The  
11  
12 Stationery Office, 2010.  
13
- 14 3. Millar R, Hall K. Social return on investment (SROI) and performance measurement: The  
15  
16 opportunities and barriers for social enterprises in health and social care. *Public*  
17  
18 *Management Review* 2013;15(6):923-41.  
19
- 20 4. Roy MJ, Donaldson C, Baker R, et al. Social enterprise: New pathways to health and well-being?  
21  
22 *Journal of Public Health Policy* 2013;34(1):55-68.  
23
- 24 5. Miller R, Hall K, Millar R. Right to Request social enterprises: a welcome addition to third sector  
25  
26 delivery of English healthcare? *Voluntary Sector Review* 2012;3(2):275-85.  
27
- 28 6. UK Government. Social Enterprise: Market Trends 2017. London: Department for Digital, Culture,  
29  
30 Media and Sport, and Department for Business, Energy and Industrial Strategy,  
31  
32 [https://www.gov.uk/government/uploads/system/uploads/attachment\\_data/file/644266/](https://www.gov.uk/government/uploads/system/uploads/attachment_data/file/644266/MarketTrends2017report_final_sept2017.pdf)  
33  
34 [MarketTrends2017report\\_final\\_sept2017.pdf](https://www.gov.uk/government/uploads/system/uploads/attachment_data/file/644266/MarketTrends2017report_final_sept2017.pdf), 2017.  
35  
36
- 37 7. Australia Government. Australian Innovation System Report: Chapter 5: Public Sector and Social  
38  
39 Innovation. Canberra: Department of Industry Innovation, Sciences, Research and Tertiary  
40  
41 Education, [https://industry.gov.au/Office-of-the-Chief-](https://industry.gov.au/Office-of-the-Chief-Economist/Publications/Policy/AustralianInnovationSystemReport/AISR2011/chapter-5-public-sector-and-social-innovation/social-innovation-in-australia/index.html)  
42  
43 [Economist/Publications/Policy/AustralianInnovationSystemReport/AISR2011/chapter-5-](https://industry.gov.au/Office-of-the-Chief-Economist/Publications/Policy/AustralianInnovationSystemReport/AISR2011/chapter-5-public-sector-and-social-innovation/social-innovation-in-australia/index.html)  
44  
45 [public-sector-and-social-innovation/social-innovation-in-australia/index.html](https://industry.gov.au/Office-of-the-Chief-Economist/Publications/Policy/AustralianInnovationSystemReport/AISR2011/chapter-5-public-sector-and-social-innovation/social-innovation-in-australia/index.html), 2011.  
46  
47
- 48 8. Barraket J, Collyer N, O'Connor M, et al. Finding Australia's social enterprise sector. *Report for the*  
49  
50 *Australian Centre for Philanthropy and Nonprofit Studies, Social Traders, Melbourne* 2010  
51  
52  
53  
54  
55  
56  
57

- 1  
2  
3 9. British Council. Social enterprise in Vietnam: concept, context and policies. Hanoi, Vietnam:  
4  
5 [https://www.britishcouncil.org/sites/default/files/vietnam\\_report.pdf](https://www.britishcouncil.org/sites/default/files/vietnam_report.pdf), 2012.  
6  
7
- 8 10. British Council. The state of social enterprise in Bangladesh, Ghana, India and Pakistan.  
9  
10 Manchester, UK. [https://www.britishcouncil.org/society/social-enterprise/news-](https://www.britishcouncil.org/society/social-enterprise/news-events/reports-survey-social-enterprise-BGD-GHA-IND-PAK2016)  
11  
12 [events/reports-survey-social-enterprise-BGD-GHA-IND-PAK2016](https://www.britishcouncil.org/society/social-enterprise/news-events/reports-survey-social-enterprise-BGD-GHA-IND-PAK2016), 2016.  
13  
14
- 15 11. Moody M, Littlepage L, Paydar N. Measuring Social Return on Investment: lessons from  
16  
17 organisational implementation of SROI in the Netherlands and the United States. *Nonprofit*  
18  
19 *Management and Leadership* 2015;26(1):19-37.  
20  
21
- 22 12. Krlev G, Münscher R, Mülbert K. Social Return on Investment (SROI): state-of-the-art and  
23  
24 perspectives-a meta-analysis of practice in Social Return on Investment (SROI) studies  
25  
26 published 2002-2012. 2013  
27  
28
- 29 13. Nicholls J, Lawlor E, Neitzert E, et al. A Guide to Social Return on Investment. The Office of the  
30  
31 Third Sector (OTS): Government of Scotland, UK, 2012.  
32  
33
- 34 14. Arvidson M, Lyon F, McKay S, et al. The ambitions and challenges of SROI. TSRC, Birmingham,  
35  
36 2010  
37
- 38 15. Arvidson M, Lyon F. Social impact measurement and non-profit organisations: compliance,  
39  
40 resistance, and promotion. *VOLUNTAS: International Journal of Voluntary and Nonprofit*  
41  
42 *Organizations* 2014;25(4):869-86.  
43  
44
- 45 16. Banke-Thomas AO, Madaj B, Charles A, et al. Social Return on Investment (SROI) methodology to  
46  
47 account for value for money of public health interventions: a systematic review. *BMC Public*  
48  
49 *Health* 2015;15(1):582.  
50  
51
- 52 17. Mulgan G. Measuring social value. *Stanford Social Innovation Review* 2010;8(3):38-43.  
53
- 54 18. Pathak P, Dattani P. Social return on investment: three technical challenges. *Social Enterprise*  
55  
56 *Journal* 2014;10(2):91-104.  
57  
58

- 1  
2  
3 19. Gibbon J, Dey C. Developments in social impact measurement in the third sector: scaling up or  
4  
5 dumbing down? *Social and Environmental Accountability Journal*. 2011 Apr 1;31(1):63-72.  
6  
7  
8 20. Farr M, Cressey P. The social impact of advice during disability welfare reform: from social return  
9  
10 on investment to evidencing public value through realism and complexity. *Public*  
11  
12 *Management Review*. 2019 Feb 1;21(2):238-63.  
13  
14 21. Fujiwara D. The seven principle problems of SROI. London: Simetrica Ltd; 2015. Available from:  
15  
16 [http://www.socialvalueuk.org/app/uploads/2016/03/The%20Seven%20Principle%20Problems%20with%20SROI\\_Daniel%20Fujiwara.pdf](http://www.socialvalueuk.org/app/uploads/2016/03/The%20Seven%20Principle%20Problems%20with%20SROI_Daniel%20Fujiwara.pdf)  
17  
18  
19  
20  
21 22. Social Ventures Australia Consulting. Social Return on Investment: Lessons learned in Australia,  
22  
23 2012.  
24  
25 23. Hutchinson CL, Berndt A, Gilbert-Hunt S, George S, Ratcliffe J. Valuing the impact of health and  
26  
27 social care programmes using social return on investment analysis: how have academics  
28  
29 advanced the methodology? A protocol for a systematic review of peer-reviewed literature.  
30  
31 *BMJ Open*. 2018;8(12):e022534.  
32  
33 24. Shamseer L, Moher D, Clarke M, et al. Preferred reporting items for systematic review and meta-  
34  
35 analysis protocols (PRISMA-P) 2015: elaboration and explanation. *BMJ: British Medical*  
36  
37 *Journal* 2015;2(349):g7647.  
38  
39 25. *Covidence systematic review software, veritas health innovation*. Melbourne, Australia. Available  
40  
41 at [www.covidence.org](http://www.covidence.org)  
42  
43  
44 26. Laing CM, Moules NJ. Social Return on Investment: A New Approach to Understanding and  
45  
46 Advocating for Value in Healthcare. *Jona: The Journal of Nursing Administration*  
47  
48 2017;47(12):623-28.  
49  
50  
51 27. Arvidson M, Battye F, Salisbury D. The social return on investment in community befriending.  
52  
53 *International Journal of Public Sector Management* 2014;27(3):225-40.  
54  
55  
56  
57  
58  
59  
60



- 1  
2  
3 28. Goudet S, Griffiths P, Wainaina C, et al. Social value of a nutritional counselling and support  
4 program for breastfeeding in urban poor settings, Nairobi. *BMC Public Health* 2018;18(1)  
5  
6 doi: 10.1186/s12889-018-5334-8  
7  
8  
9
- 10 29. Kennedy, R, Phillips, J. Social Return on Investment (SROI): A Case Study with an Expert Patient  
11 Programme. *SelfCare* 2011;2(11):10-20.  
12  
13
- 14 30. Lafrati, S. The investment and regenerative value of addiction treatment. *Drugs and Alcohol*  
15 Today 2015;15(1):12-20.  
16  
17
- 18 31. Mook L, Chan A, Kershaw D. Measuring Social Enterprise Value Creation. *Nonprofit Management*  
19 and Leadership 2015;26(2):189-207.  
20  
21
- 22 32. Scharlach, AE. Estimating the Value of Volunteer-Assisted Community-Based Aging Services: A  
23 Case Example, *Home Health Care Services Quarterly* 2015;34(1):46-65. DOI:  
24  
25 10.1080/01621424.2014.999902  
26  
27
- 28 33. Willis E, Semple AC, de Waal H. Quantifying the benefits of peer support for people with  
29 dementia: A Social Return on Investment (SROI) study. *Dementia* 2016:1471301216640184.  
30  
31
- 32 34. HACT Social Value Bank. London. Available from: <https://www.hact.org.uk/social-value-bank>  
33  
34
- 35 35. Global Value Exchange. Liverpool: Social Value UK. Available from:  
36  
37 <http://www.globalvaluexchange.org/>  
38  
39
- 40 36. Cohen J. Weighted kappa: Nominal scale agreement provision for scaled disagreement or partial  
41 credit. *Psychological Bulletin*. 1968;70(4):213.  
42  
43  
44  
45  
46  
47  
48  
49  
50  
51  
52  
53  
54

55 Figure 1: PRISMA Flow Chart  
56  
57

1  
2  
3  
4  
5  
6  
7  
8  
9  
10  
11  
12  
13  
14  
15  
16  
17  
18  
19  
20  
21  
22  
23  
24  
25  
26  
27  
28  
29  
30  
31  
32  
33  
34  
35  
36  
37  
38  
39  
40  
41  
42  
43  
44  
45  
46  
47  
48  
49  
50  
51  
52  
53  
54  
55  
56  
57  
58  
59  
60

Figure 1: PRISMA Flow Chart

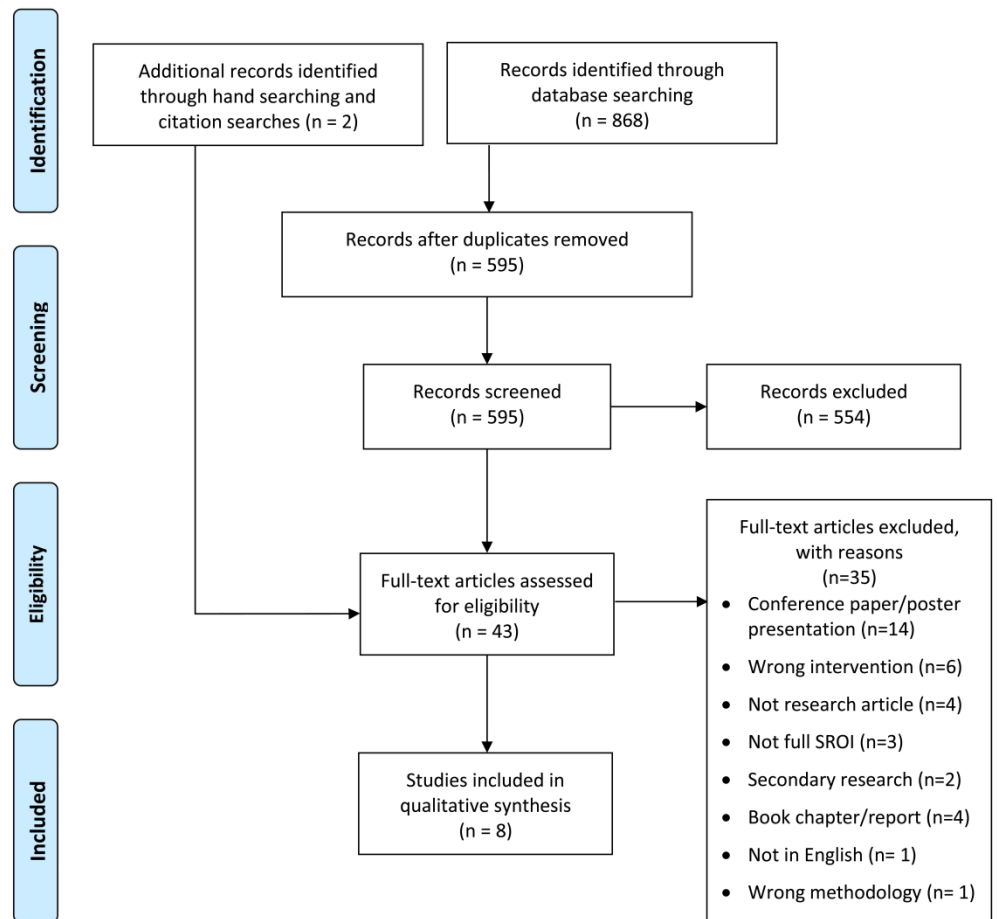

500x506mm (300 x 300 DPI)

## Appendix I: Examples of Search strategy

| Database       | Search Terms                                                                                                                                                                                                                                                                                                                                                                                                                                                                                             |
|----------------|----------------------------------------------------------------------------------------------------------------------------------------------------------------------------------------------------------------------------------------------------------------------------------------------------------------------------------------------------------------------------------------------------------------------------------------------------------------------------------------------------------|
| Web of Science | TS={"social return on investment" OR SROI}<br>Indexes=SCI-EXPANDED, SSCI, A&HCI, CPCI-S, CPCI-SSH, ESCI, CCR-EXPANDED, IC<br>timespan=2000-2018                                                                                                                                                                                                                                                                                                                                                          |
| MEDLINE        | #1 "social return on investment".mp. [mp=title, abstract, original title, name of substance word, subject heading work, keyword heading word, protocol supplementary concept work, rare disease supplementary concept word, unique identifier, synonyms]<br>#2 SROI.mp. [mp=title, abstract, original title, name of substance word, subject heading work, keyword heading word, protocol supplementary concept work, rare disease supplementary concept word, unique identifier, synonyms]<br>#3 1 or 2 |
| PsychINFO      | #1 "social return on investment".mp. [mp=title, abstract, heading word, table of contents, key concepts, original title, tests & measures]<br>#2 SROI.mp. [mp=title, abstract, heading word, table of contents, key concepts, original title, tests & measures]<br>#3 1 or 2                                                                                                                                                                                                                             |

## Appendix II: Data Extraction

| Author/date               | Country | Intervention                                                                                                   | Study Design                                                                     | Innovation / adaptations / additions to SROI methodology                                                                                                                                    | Word Count | Externally referenced data                                                                                                                                                                                                       | Quality Assessment |
|---------------------------|---------|----------------------------------------------------------------------------------------------------------------|----------------------------------------------------------------------------------|---------------------------------------------------------------------------------------------------------------------------------------------------------------------------------------------|------------|----------------------------------------------------------------------------------------------------------------------------------------------------------------------------------------------------------------------------------|--------------------|
| Arvidson et al. (2014)    | UK      | Community support for people with post-natal depression                                                        | Mixed methods; primary and secondary data sources                                | Costed in-kind support to calculate how many resources the organisation leverages based on funder investment (£1.30 for each £1)                                                            | 5297       | Refers to the existence of a logic model, dead-weight and drop-off but does not include in article – readers required to email contact author for full report                                                                    | 12/20 (60%)        |
| Goudet et al. (2018)      | Kenya   | Home-based counselling of pregnant and breastfeeding women and mothers of young children                       | Mixed methods; primary data (quantitative and qualitative)                       | None identified                                                                                                                                                                             | 7577       | Online links to full data set; additional file attached to online journal article containing steps in the program, content of counselling messages, full list of stakeholders, and assumptions for base case scenario variables. | 18/20 (90%)        |
| Kennedy & Phillips (2011) | UK      | Community-based self-management training and support groups for people affected by substance and alcohol abuse | Primary data sources (interviews and questionnaire); Post-intervention data only | Beneficiary costs not typically included in SROI analysis. Authors included participants travel expenses to attend the intervention as an input.                                            | 3209       | Downloadable supplementary information: stakeholders, questionnaires, and impact map                                                                                                                                             | 14/20 (70%)        |
| Iafrati (2015)            | UK      | Residential drug addiction treatment centre                                                                    | Pre/post primary data; quantitative and qualitative                              | Outcomes weighted at 65% (overall reported success rate of intervention according to organisation) to address positive sample bias<br><br>Focus on societal impacts under a socio-political | 3904       | None                                                                                                                                                                                                                             | 8/21 (38%)         |

|                       |        |                                                                                                                                    |                                                                      |                                                                                                                                                          |      |                                                                                                                                                                                                           |             |
|-----------------------|--------|------------------------------------------------------------------------------------------------------------------------------------|----------------------------------------------------------------------|----------------------------------------------------------------------------------------------------------------------------------------------------------|------|-----------------------------------------------------------------------------------------------------------------------------------------------------------------------------------------------------------|-------------|
|                       |        |                                                                                                                                    |                                                                      | framework rather than consumers personal outcomes                                                                                                        |      |                                                                                                                                                                                                           |             |
| Laing & Moules (2017) | Canada | Camp for children with cancer                                                                                                      | Post intervention data collection                                    | None identified                                                                                                                                          | 2919 | Supplemental digital content (permalink through journal) – link to relevant table provided in-text. Link contains additional information about the theory of change, deadweight, indicators, and proxies. | 14/20 (70%) |
| Mook et al. (2015)    | Canada | Furniture bank for people transitioning out of homelessness, women and children escaping abusive situations, migrants and refugees | Post intervention, retrospective case worker surveys; secondary data | None identified                                                                                                                                          | 6446 | None                                                                                                                                                                                                      | 12/20 (60%) |
| Scharlach (2015)      | USA    | Volunteer-assisted services for vulnerable older people living in the community                                                    | Pre/post assessment and interview data                               | An SROI ratio was calculated for service users based on membership fees                                                                                  | 6076 | None                                                                                                                                                                                                      | 10/21 (48%) |
| Willis et al. (2016)  | UK     | Peer-support groups for people with dementia (3 groups ran by different organisations)                                             | Post-intervention data through interviews and focus groups           | Weightings were applied to financial proxies to reflect that the 3 groups in the study met for different lengths of time and with different frequencies. | 3842 | External full SROI report – linked in the reference list of article (broken link). Full report contains additional information about stakeholders, inputs, deadweight, indicators and proxies             | 17/20 (85%) |

1  
2  
3  
4  
5  
6  
7  
8  
9  
10  
11  
12  
13  
14  
15  
16  
17  
18  
19  
20  
21  
22  
23  
24  
25  
26  
27  
28  
29  
30  
31  
32  
33  
34  
35  
36  
37  
38  
39  
40  
41  
42  
43  
44  
45  
46

**Appendix III: SROI Quality Assessment**

| Research Question                                                                                                         | Scoring                    | Notes |
|---------------------------------------------------------------------------------------------------------------------------|----------------------------|-------|
| Was a well-defined question posed?                                                                                        | Yes / No / Not clear       |       |
| <b>Reason for use of SROI Method</b>                                                                                      |                            |       |
| Were authors transparent about why SROI methodology was chosen? (e.g. strategic planning/funding requirements)            | Yes / No / Not clear       |       |
| Did authors report relevant background literature/ justify the need for the study?                                        | Yes / No / Not clear<br>NA |       |
| <b>Scope</b>                                                                                                              |                            |       |
| Was the range of stakeholders included/excluded justified?                                                                | Yes / No / Not clear       |       |
| Was the range of stakeholders wide enough to adequately answer the research question? (principle of understanding change) | Yes / No / Not clear       |       |
| Was it clear how stakeholders were involved and what data would be gathered from them?                                    | Yes / No / Not clear       |       |
| Was ethics obtained/informed consent provided?                                                                            | Yes / No / Not clear       |       |
| <b>Theory of change/impact map</b>                                                                                        |                            |       |
| Was the theory of change clear? i.e. the relationships between inputs, outputs and outcomes                               | Yes / No / Not clear       |       |
| Were unintended outcomes (positive/negative) detailed?                                                                    | Yes / No / Not clear       |       |
| <b>Study Design</b>                                                                                                       |                            |       |
| Was the study design appropriate for the study question? (Control group, pre-post)                                        | Yes / No / Not clear       |       |
| Was the sample described in detail/was the sample justified?                                                              | Yes / No / Not clear       |       |

| Analysis                                                                                                                                                                               |                           |  |
|----------------------------------------------------------------------------------------------------------------------------------------------------------------------------------------|---------------------------|--|
| Were inputs clear with non-monetized inputs valued appropriately?                                                                                                                      | Yes / No / Not clear      |  |
| Were capital costs, as well as operating costs included?                                                                                                                               | Yes / No / Not clear / NA |  |
| Were costs that occur in the future 'discounted' to their present values? Was justification given for the discount rate used?                                                          | Yes / No / Not clear      |  |
| Was dead-weight clearly described and calculated?                                                                                                                                      | Yes / No / Not clear      |  |
| Were the indicators valid and comprehensive? (Were the sources of all values clearly identified?)                                                                                      | Yes / No / Not clear      |  |
| Were the proxies valid and comprehensive? (Were the sources of all values clearly identified?)                                                                                         | Yes / No / Not clear      |  |
| Was length of benefit established and justified? (Drop-off) (In capital projects, did authors establish and differentiate between length of benefit and life expectancy of the asset?) | Yes / No / Not clear      |  |
| Were limitations and biases reported?                                                                                                                                                  | Yes / No / Not clear      |  |
| Was the final SROI ratio interpreted?                                                                                                                                                  | Yes / No / Not clear      |  |
| Was sensitivity analysis performed? Was justification provided for the range of values (or for key study parameters) in the sensitivity analysis?                                      | Yes / No / Not clear      |  |



# PRISMA 2009 Checklist

| Section/topic                      | #  | Checklist item                                                                                                                                                                                                                                                                                              | Reported on page # |
|------------------------------------|----|-------------------------------------------------------------------------------------------------------------------------------------------------------------------------------------------------------------------------------------------------------------------------------------------------------------|--------------------|
| <b>TITLE</b>                       |    |                                                                                                                                                                                                                                                                                                             |                    |
| Title                              | 1  | Identify the report as a systematic review, meta-analysis, or both.                                                                                                                                                                                                                                         | 2                  |
| <b>ABSTRACT</b>                    |    |                                                                                                                                                                                                                                                                                                             |                    |
| Structured summary                 | 2  | Provide a structured summary including, as applicable: background; objectives; data sources; study eligibility criteria, participants, and interventions; study appraisal and synthesis methods; results; limitations; conclusions and implications of key findings; systematic review registration number. | 2-3                |
| <b>INTRODUCTION</b>                |    |                                                                                                                                                                                                                                                                                                             |                    |
| Rationale                          | 3  | Describe the rationale for the review in the context of what is already known.                                                                                                                                                                                                                              | 5-6                |
| Objectives                         | 4  | Provide an explicit statement of questions being addressed with reference to participants, interventions, comparisons, outcomes, and study design (PICOS).                                                                                                                                                  | 6                  |
| <b>METHODS</b>                     |    |                                                                                                                                                                                                                                                                                                             |                    |
| Protocol and registration          | 5  | Indicate if a review protocol exists, if and where it can be accessed (e.g., Web address), and, if available, provide registration information including registration number.                                                                                                                               | 6                  |
| Eligibility criteria               | 6  | Specify study characteristics (e.g., PICOS, length of follow-up) and report characteristics (e.g., years considered, language, publication status) used as criteria for eligibility, giving rationale.                                                                                                      | 7                  |
| Information sources                | 7  | Describe all information sources (e.g., databases with dates of coverage, contact with study authors to identify additional studies) in the search and date last searched.                                                                                                                                  | 7                  |
| Search                             | 8  | Present full electronic search strategy for at least one database, including any limits used, such that it could be repeated.                                                                                                                                                                               | 7                  |
| Study selection                    | 9  | State the process for selecting studies (i.e., screening, eligibility, included in systematic review, and, if applicable, included in the meta-analysis).                                                                                                                                                   | 7                  |
| Data collection process            | 10 | Describe method of data extraction from reports (e.g., piloted forms, independently, in duplicate) and any processes for obtaining and confirming data from investigators.                                                                                                                                  | 8                  |
| Data items                         | 11 | List and define all variables for which data were sought (e.g., PICOS, funding sources) and any assumptions and simplifications made.                                                                                                                                                                       | 8                  |
| Risk of bias in individual studies | 12 | Describe methods used for assessing risk of bias of individual studies (including specification of whether this was done at the study or outcome level), and how this information is to be used in any data synthesis.                                                                                      | 8                  |
| Summary measures                   | 13 | State the principal summary measures (e.g., risk ratio, difference in means).                                                                                                                                                                                                                               | N/A                |
| Synthesis of results               | 14 | Describe the methods of handling data and combining results of studies, if done, including measures of consistency (e.g., I <sup>2</sup> ) for each meta-analysis.                                                                                                                                          | 8-9                |





# PRISMA 2009 Checklist

Page 1 of 2

| Section/topic                 | #  | Checklist item                                                                                                                                                                                           | Reported on page # |
|-------------------------------|----|----------------------------------------------------------------------------------------------------------------------------------------------------------------------------------------------------------|--------------------|
| Risk of bias across studies   | 15 | Specify any assessment of risk of bias that may affect the cumulative evidence (e.g., publication bias, selective reporting within studies).                                                             | 10                 |
| Additional analyses           | 16 | Describe methods of additional analyses (e.g., sensitivity or subgroup analyses, meta-regression), if done, indicating which were pre-specified.                                                         | N/A                |
| <b>RESULTS</b>                |    |                                                                                                                                                                                                          |                    |
| Study selection               | 17 | Give numbers of studies screened, assessed for eligibility, and included in the review, with reasons for exclusions at each stage, ideally with a flow diagram.                                          | 9 & Figure 1       |
| Study characteristics         | 18 | For each study, present characteristics for which data were extracted (e.g., study size, PICOS, follow-up period) and provide the citations.                                                             | 9 & Table 2        |
| Risk of bias within studies   | 19 | Present data on risk of bias of each study and, if available, any outcome level assessment (see item 12).                                                                                                | 12-13 & Table 2    |
| Results of individual studies | 20 | For all outcomes considered (benefits or harms), present, for each study: (a) simple summary data for each intervention group (b) effect estimates and confidence intervals, ideally with a forest plot. | 10-12              |
| Synthesis of results          | 21 | Present results of each meta-analysis done, including confidence intervals and measures of consistency.                                                                                                  | N/A                |
| Risk of bias across studies   | 22 | Present results of any assessment of risk of bias across studies (see Item 15).                                                                                                                          | N/A                |
| Additional analysis           | 23 | Give results of additional analyses, if done (e.g., sensitivity or subgroup analyses, meta-regression [see Item 16]).                                                                                    | N/A                |
| <b>DISCUSSION</b>             |    |                                                                                                                                                                                                          |                    |
| Summary of evidence           | 24 | Summarize the main findings including the strength of evidence for each main outcome; consider their relevance to key groups (e.g., healthcare providers, users, and policy makers).                     | 13-14              |
| Limitations                   | 25 | Discuss limitations at study and outcome level (e.g., risk of bias), and at review-level (e.g., incomplete retrieval of identified research, reporting bias).                                            | 14-15              |
| Conclusions                   | 26 | Provide a general interpretation of the results in the context of other evidence, and implications for future research.                                                                                  | 15                 |
| <b>FUNDING</b>                |    |                                                                                                                                                                                                          |                    |
| Funding                       | 27 | Describe sources of funding for the systematic review and other support (e.g., supply of data); role of funders for the systematic review.                                                               | 16                 |

42

43 From: Moher D, Liberati A, Tetzlaff J, Altman DG, The PRISMA Group (2009). Preferred Reporting Items for Systematic Reviews and Meta-Analyses: The PRISMA Statement. PLoS Med 6(7): e1000097.  
 44 doi:10.1371/journal.pmed1000097

45 For peer review only: <http://onlinelibrary.wiley.com/doi/10.1136/bmjopen-2014-001616>  
 46 For more information, visit [www.prisma-statement.org](http://www.prisma-statement.org)  
 47

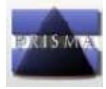

# PRISMA 2009 Checklist

For peer review only

- 1
- 2
- 3
- 4
- 5
- 6
- 7
- 8
- 9
- 10
- 11
- 12
- 13
- 14
- 15
- 16
- 17
- 18
- 19
- 20
- 21
- 22
- 23
- 24
- 25
- 26
- 27
- 28
- 29
- 30
- 31
- 32
- 33
- 34
- 35
- 36
- 37
- 38
- 39
- 40
- 41
- 42
- 43
- 44
- 45
- 46
- 47
